1     **The *Firre* locus produces a trans-acting RNA molecule that functions in hematopoiesis**

2     Jordan P. Lewandowski<sup>1</sup>, James C. Lee<sup>1,2</sup>, Taeyoung Hwang<sup>1,12</sup>, Hongjae Sunwoo<sup>6</sup>, Jill M.  
3     Goldstein<sup>1,10</sup>, Abigail F. Groff<sup>1,11</sup>, Nydia Chang<sup>1</sup>, William Mallard<sup>1</sup>, Adam Williams<sup>8</sup>, Jorge Henao-  
4     Meija<sup>7</sup>, Richard A. Flavell<sup>9</sup>, Jeannie T. Lee<sup>4,5,6</sup>, Chiara Gerhardinger<sup>1</sup>, Amy J. Wagers<sup>1,3,10</sup>, and  
5     John L. Rinn<sup>1,5,12,\*</sup>

6  
7     <sup>1</sup>Department of Stem Cell and Regenerative Biology and Harvard Stem Cell Institute, Harvard University,  
8     Cambridge, MA, USA; <sup>2</sup>Department of Medicine, University of Cambridge School of Clinical Medicine,  
9     Addenbrooke's Hospital, Cambridge CB2 0QQ, UK; <sup>3</sup>Joslin Diabetes Center, Boston, MA, USA;  
10    <sup>4</sup>Department of Genetics, Harvard Medical School, Boston, Massachusetts, USA; <sup>5</sup>Howard Hughes Medical  
11    Institute, Boston, Massachusetts 02114, USA; <sup>6</sup>Department of Molecular Biology, Massachusetts General  
12    Hospital, Boston, Massachusetts 02114, USA; <sup>7</sup>Department of Pathology and Laboratory Medicine,  
13    Perelman School of Medicine University of Pennsylvania, Philadelphia, PA, USA; <sup>8</sup>The Jackson Laboratory,  
14    JAX Genomic Medicine, Farmington, CT, USA; <sup>9</sup>Department of Immunobiology and Howard Hughes  
15    Medical Institute, Yale University, School of Medicine, New Haven, CT, USA; <sup>10</sup>Paul F. Glenn Center for  
16    the Biology of Aging, Harvard Medical School, 77 Louis Pasteur Avenue, Boston, MA <sup>11</sup>Department of  
17    Systems Biology, Harvard Medical School, Boston, MA, USA <sup>12</sup>BioFrontiers Institute, University of Colorado  
18    Boulder, Boulder, CO, USA

19  
20    \*Corresponding author: john.rinn@colorado.edu

21  
22  
23  
24

25    **Key words:** *Firre*, *trans*, lncRNA, RNA, in vivo, lymphopoiesis, RNA-seq, cytokine, and genetics

26

27

28

29

30

31

32

33

34

35

36

37

38

39 **ABSTRACT**

40 RNA has been classically known to play central roles in biology, including maintaining telomeres<sup>1</sup>,  
41 protein synthesis<sup>2</sup>, and in sex chromosome compensation in certain species<sup>3,4</sup>. At the center of  
42 these important biological systems are noncoding RNAs. While thousands of long noncoding  
43 RNAs (lncRNAs) have been identified in mammalian genomes<sup>5-8</sup>, attributing RNA-based roles to  
44 lncRNA loci requires an assessment of whether the observed effect could be due to DNA  
45 regulatory elements, the act of transcription, or the lncRNA transcript. Here, we use the  
46 syntenically conserved lncRNA locus, Functional intergenic repeating RNA element (*Firre*), that  
47 is located on the X chromosome as a model to discriminate between DNA- and RNA-mediated  
48 effects *in vivo*. To this end, we generated genetically defined loss-of-function, gain-of-function,  
49 and rescue mouse models for *Firre* and provide genetic evidence that the *Firre* locus produces a  
50 *trans*-acting RNA. We report that: (i) *Firre* mutant mice have cell-specific defects during  
51 hematopoiesis and changes in gene expression that can be rescued by induction of *Firre* RNA  
52 from a transgene in the *Firre* knockout background, (ii) mice overexpressing *Firre* from a  
53 transgene exhibit increased levels of pro-inflammatory cytokines and impaired survival upon  
54 exposure to lipopolysaccharide, and (iii) deletion of the *Firre* locus did not result in changes in  
55 local gene expression on the X chromosome in 9 different biological contexts, suggesting that  
56 *Firre* does not function by *cis*-acting RNA or DNA elements. Together, our results provide genetic  
57 evidence that the *Firre* locus produces a *trans*-acting lncRNA that has physiological roles in  
58 hematopoiesis and immune function.

59  
60  
61  
62  
63  
64  
65  
66  
67  
68  
69  
70  
71  
72

## 73 INTRODUCTION

74 Transcription occurs at thousands of sites throughout the mammalian genome. Many of these  
75 sites are devoid of protein-coding genes and instead contain long noncoding RNAs (lncRNAs).  
76 While lncRNA loci have been implicated in a variety of biological functions, comparatively few  
77 lncRNA loci have been genetically defined to have RNA-based roles. Indeed, deletions of entire  
78 lncRNA loci have uncovered a number of *in vivo* phenotypes<sup>9–13</sup>; however, this approach alone is  
79 confounded because in addition to the lncRNA transcript, lncRNA loci can also exert function  
80 through DNA regulatory elements<sup>14–16</sup>, the promoter region<sup>17</sup>, as well as by the act of  
81 transcription<sup>18,19</sup>. Thus, attributing RNA-based role(s) to lncRNA loci requires testing whether  
82 other regulatory modes potentially present at the locus have molecular activity that could  
83 contribute to phenotypic effects<sup>11,20,21</sup>.

84 In this study, we use the *Firre* locus as a model to discriminate between DNA- and RNA-  
85 mediated effects *in vivo*. We selected this locus for our study because it is syntenically conserved  
86 in a number of mammals including human<sup>22–25</sup>, and because studies have reported diverse  
87 biological and molecular roles. Early characterization of the *FIRRE* locus in human cell lines  
88 identified it as a region that interacts with the X-linked macrosatellite region, *DXZ4*, in a CTCF-  
89 dependent manner<sup>26–29</sup>. Further analyses of the *Firre* locus demonstrated that it produces a  
90 lncRNA that escapes X-inactivation<sup>23,30–32</sup>, although it is predominately expressed from the active  
91 X chromosome<sup>29</sup>. Studies using cell culture models suggest that the *Firre* locus has biological  
92 roles in multiple processes, including adipogenesis<sup>33</sup>, nuclear architecture<sup>23,27,29</sup>, and regulation  
93 of gene expression programs<sup>23,34</sup>. Additionally, there is some evidence for roles in human  
94 development and disease<sup>35–38</sup>. Collectively, these studies demonstrate the diverse cellular and  
95 biological functions for the *Firre* locus. However, the biological roles of *Firre* as well as  
96 disentangling DNA- and RNA- mediated function(s) for the *Firre* locus have not been explored *in*  
97 *vivo*.

98 Using multiple genetic approaches, we describe an *in vivo* role for the *Firre* locus during  
99 hematopoiesis. We report that *Firre* mutant mice have cell-specific defects in hematopoietic  
100 populations. Deletion of *Firre* is accompanied by significant changes in gene expression in a  
101 hematopoietic progenitor cell type, which can be rescued by induction of *Firre* RNA from a  
102 transgene within the *Firre* knockout background. Mice overexpressing *Firre* have increased levels  
103 of pro-inflammatory cytokines and impaired survival upon exposure to lipopolysaccharide (LPS).  
104 Finally, the *Firre* locus does not contain *cis*-acting RNA or DNA elements (including the promoter)  
105 that regulate neighboring gene expression on the X chromosome (9 biological contexts  
106 examined), suggesting that *Firre* does not function in *cis*. Collectively, our study provides evidence

107 for a *trans*-acting RNA-based role for the *Firre* locus that has physiological importance for  
108 hematopoiesis and immune function.

109

110

111

## 112 **RESULTS**

113 **The *Firre* locus produces an abundant lncRNA.** We first sought to investigate the gene  
114 expression properties for *Firre* RNA *in vivo*. To determine potential spatial and temporal aspects  
115 of *Firre* RNA expression during development, we performed *in situ* hybridization in wildtype (WT)  
116 mouse embryos (E8.0 – E12.5). Notably, we detected *Firre* RNA in many embryonic tissues,  
117 including the forebrain, midbrain, pre-somitic mesoderm, lung, forelimb, hindlimb, liver, and heart  
118 (Fig. 1A). Since noncoding RNAs have been described to be generally expressed at lower levels  
119 compared to protein-coding genes<sup>39-42</sup>, we determined the relative abundance of *Firre* RNA *in*  
120 *vivo*. We performed RNA-seq on eight different WT embryonic tissues and plotted the expression  
121 of noncoding and coding transcripts. Consistent with previous reports<sup>39-42</sup>, we observed that  
122 noncoding transcripts were generally less abundant than protein-coding transcripts (Fig. 1B).  
123 Despite most lncRNAs being expressed at low levels, we found that *Firre*, like *Malat1*<sup>43-45</sup>, is an  
124 abundant transcript (Fig. 1B). Next, since *Firre* is located on the X chromosome and escapes X-  
125 inactivation<sup>23,30-32</sup>, we investigated whether *Firre* has different expression levels in male and  
126 female WT tissues. While levels of *Firre* RNA varied across embryonic tissue types, within  
127 individual tissues, male and female samples exhibited similar expression levels of *Firre*, despite  
128 escaping X inactivation (Fig. 1C).

129

130 ***Firre* knockout and overexpression mice are viable and fertile.** To investigate the *in vivo* role  
131 of *Firre* and assess DNA- and RNA-mediated effects, we generated both *Firre* loss-of-function  
132 and *Firre* overexpression mice. To delete the *Firre* locus *in vivo*, we generated a mouse line  
133 containing a floxed allele (*Firre*<sup>flxed</sup>) from a previously targeted mouse embryonic stem cell line<sup>23</sup>  
134 and mated to a CMV-Cre deleter mouse<sup>46</sup>. This produced a genomic deletion (81.8 kb) that  
135 removed the entire *Firre* gene body and promoter (henceforth called  $\Delta$ *Firre*) (Fig. 1D). We  
136 confirmed the deletion of the *Firre* locus by genotyping (Extended Data Fig. 1) and examined *Firre*  
137 RNA expression. As expected, we did not detect *Firre* RNA in  $\Delta$ *Firre* embryos by whole-mount *in*  
138 *situ* hybridization or by RNA-seq (Fig. 1A, D).

139 Since *Firre* is found on the X chromosome, we first sought to determine if deletion of the  
140 locus had an effect on the expected sex ratio of the progeny. Matings between  $\Delta$ *Firre* mice



141 produced viable progeny with a normal frequency of male and female pups that did not exhibit  
142 overt morphological, skeletal, or weight defects (Extended Data Table 1 and Extended Data Fig.  
143 2). Moreover, deletion of *Firre* did not impact expression levels of *Xist* RNA in embryonic tissues  
144 or perturb *Xist* RNA localization during random X chromosome inactivation (XCI) in mouse  
145 embryonic fibroblasts (MEFs) (Extended Data Fig. 3A-C).

146 Because the  $\Delta$ *Firre* allele removes the entire gene body, this model does not allow us to  
147 distinguish between DNA- and RNA- mediated effects. Therefore, in order to be able to investigate  
148 the role of *Firre* RNA, we generated a doxycycline (dox)-inducible *Firre* overexpression mouse.  
149 This mouse model was engineered to contain a *Firre* cDNA downstream of a tet-responsive  
150 element (henceforth called tg(*Firre*)) and was mated to mice that constitutively express the  
151 reverse tetracycline transcriptional activator (*rtTA*) gene (combined alleles henceforth called  
152 *Firre*<sup>OE</sup>) (Fig. 1E). This approach enabled systemic induction of *Firre* RNA in a temporally  
153 controllable manner by the administration of dox. Moreover, by combining the *Firre*<sup>OE</sup> and  $\Delta$ *Firre*  
154 alleles (henceforth called *Firre*<sup>rescue</sup>) we could test whether *Firre* RNA expression alone is sufficient  
155 to rescue phenotypes arising in the  $\Delta$ *Firre* mice, thereby distinguishing DNA- and RNA-based  
156 effects.

157 To confirm expression of transgenic *Firre* RNA, tg(*Firre*) females were mated with *rtTA*  
158 males and placed on a dox diet the day a copulatory plug was detected, and embryos were  
159 collected at E11.5 for analyses. Compared to sibling control embryos, we detected increased *Firre*  
160 RNA in *Firre*<sup>OE</sup> embryos by whole-mount *in situ* hybridization (Fig. 1F) and by quantitative reverse  
161 transcription-PCR (qRT-PCR) (heart, 16 fold; forebrain, 26.6 fold; and forelimb, 11.5 fold) (Fig.  
162 1G). Moreover, mice overexpressing *Firre* are viable and detected at expected male and female  
163 frequencies (Extended Data Table 1).

164 *Firre* RNA has been reported to be largely enriched in the nucleus of mouse embryonic  
165 stem cells (mESCs)<sup>23,47</sup>, neuronal precursor cells<sup>39</sup>, and HEK293 cells<sup>17</sup>, but also has been  
166 reported in the cytoplasm of a human colon cell line<sup>34</sup>. Thus, we investigated the subcellular  
167 localization of *Firre* in the genetic models using RNA fluorescent *in situ* hybridization (RNA FISH).  
168 In contrast to  $\Delta$ *Firre* MEFs, we detected pronounced localization of *Firre* RNA in the nucleus of  
169 WT MEFs (Fig. 1H). In dox-treated *Firre*<sup>rescue</sup> MEFs, which only produce *Firre* RNA from the  
170 transgene, we detected *Firre* RNA in both the nucleus and cytoplasm (Fig. 1H), which  
171 corresponded to approximately a 2.7-fold increase in *Firre* RNA relative to WT (Fig. 1I). Notably,  
172 the *Firre*<sup>rescue</sup> transgenic model showed both nuclear and cytoplasmic localization of *Firre*,  
173 suggesting a threshold level control for nuclear localized *Firre*.

174

175  
176 **RNA-seq of  $\Delta$ *Firre* embryonic tissues identifies tissue-specific gene dysregulation.** Given  
177 the broad expression profile of *Firre* RNA (Fig. 1A), we took an initial unbiased approach to  
178 explore the potential biological roles for the *Firre* locus, and performed poly(A)+ RNA-seq on eight  
179 E11.5 tissues from WT and  $\Delta$ *Firre* embryos (forebrain, midbrain, heart, lung, liver, forelimb,  
180 hindlimb, and pre-somitic mesoderm). As expected, *Firre* expression was not detected in any of  
181 the  $\Delta$ *Firre* tissues (Extended Data Tables 2-9). Deletion of *Firre* was accompanied by significant  
182 changes in gene expression in all tissues examined (>1FPKM, FDR<0.05) (Fig. 2A,B and  
183 Extended Data Tables 2-9).

184 Across these eight tissues, we identified a total of 3,910 significantly differentially  
185 expressed genes, of which 271 genes were differentially expressed in two or more tissues  
186 (Extended Data Tables 2-9). Interestingly, gene ontology (GO) analysis of the commonly  
187 dysregulated genes showed that deletion of the *Firre* locus affected genes involved in hemoglobin  
188 regulation and general blood developmental processes (Fig. 2C). We therefore analyzed publicly  
189 available mouse RNA-seq datasets and found that *Firre* is expressed across many blood cell  
190 types and note that expression is found highest in hematopoietic stem cells (HSCs)<sup>48</sup> and then  
191 decreases in conjunction with hematopoietic differentiation<sup>49</sup> (Fig. 2D). Based on this information  
192 we narrowed our investigation to evaluate potential roles for *Firre* in the blood system, and  
193 leveraged the genetic mouse models to test DNA- and RNA-mediated effects.

194  
195 **LPS exposure to mice overexpressing *Firre* RNA impacts the innate immune response.**  
196 *Firre* is expressed in many innate immune cell types (Fig. 2D) and has been shown to regulate  
197 the levels of inflammatory genes in human intestinal epithelial and mouse macrophage cell lines<sup>34</sup>.  
198 Thus, we hypothesized that dysregulation of *Firre* might alter the inflammatory response *in vivo*.  
199 To test this, we employed a commonly used endotoxic shock model by administering  
200 lipopolysaccharide (LPS) intraperitoneally to cohorts of WT,  $\Delta$ *Firre*, *Firre*<sup>OE</sup> no dox, and dox-fed  
201 *Firre*<sup>OE</sup> mice in order to stimulate signaling pathways that regulate inflammatory mediators<sup>50</sup> (Fig.  
202 3E).

203 We administered two different LPS preparations, one which broadly stimulates the pattern  
204 recognition receptors toll-like receptors (TLR) 2, 4 and nitric oxide synthase, and an ultrapure LPS  
205 preparation that specifically stimulates TLR4<sup>51-53</sup>. At 5 hours post LPS injection we measured  
206 serum cytokine levels. Notably, we observed that *Firre*<sup>OE</sup> dox-fed mice administered broad-acting  
207 LPS had significantly higher levels of inflammatory cytokines, including TNF $\alpha$ , IL12-p40, and MIP-  
208 2 compared to WT (Fig. 2F). In contrast, we did not observe a significant difference for these

209 cytokines in LPS-treated  $\Delta$ *Firre* mice (Fig. 2F). Consistent with the increased cytokine response  
210 using broad-acting LPS, dox-fed *Firre*<sup>OE</sup> mice administered TLR4 specific-acting LPS also had  
211 significantly higher levels of TNF $\alpha$ , IL12-p40, and MIP-2 compared to WT (Fig. 2G), albeit at lower  
212 serum concentrations compared to the broad-acting LPS (Fig. 2F,G). In addition, we confirmed  
213 that overexpressing *Firre* RNA alone (without LPS) does not result in increased serum levels of  
214 TNF $\alpha$ , IL12-p40, and MIP-2 (Extended Data Fig. 4).

215 Because increased levels of TNF $\alpha$  is a hallmark of endotoxic shock<sup>54-56</sup>, we next tested  
216 whether the levels of *Firre* RNA had an impact on survival following LPS treatment. We  
217 administered 5mg/kg of TLR4 specific-acting LPS to WT ( $n=30$ ),  $\Delta$ *Firre* ( $n=18$ ), *Firre*<sup>OE</sup> no dox  
218 ( $n=13$ ), and *Firre*<sup>OE</sup> dox-fed ( $n=17$ ) mice, as well as a saline control group and monitored for 6  
219 days. At this dose, across two independent cohorts, dox-treated *Firre*<sup>OE</sup> mice showed a  
220 significantly higher susceptibility to LPS compared to WT mice ( $P<0.0001$ , Mantel-Cox) and  
221 uninduced *Firre*<sup>OE</sup> animals ( $P=0.0063$ , Mantel-Cox) (Fig. 2H). Whereas  $\Delta$ *Firre* mice did not show  
222 a significant difference in the level of susceptibility to LPS ( $P=0.1967$ , Mantel-Cox test) (Fig. 2H).  
223 Collectively, these results indicate that increased levels of *Firre* RNA can modulate the  
224 inflammatory response *in vivo* independent of genomic context, suggesting an RNA-based role  
225 for *Firre*.

### 227 **Modulating the *Firre* locus and RNA results in cell-specific defects during hematopoiesis.**

228 Having observed an effect of *Firre* in regulating gene expression and accentuating the  
229 inflammatory response, we further investigated the role of *Firre* in hematopoiesis (Fig. 3A). We  
230 first examined cell populations in the peripheral blood in  $\Delta$ *Firre* mice and observed a modest but  
231 significant reduction in the frequencies of CD4 and CD8 T cells ( $P=0.0002$  and  $P=0.0081$ ,  
232 respectively), whereas the frequencies of B and NK cells were unaffected compared to WT (Fig.  
233 3B and Extended Data Fig. 5A). To investigate the cause of this reduction we examined the  
234 thymus (to assess for a defect in T cell development) and the bone marrow (to assess for a defect  
235 in hematopoietic progenitor cells). There was no block in thymic development in  $\Delta$ *Firre* mice, as  
236 normal frequencies of cells were observed at each developmental stage (Extended Data Fig. 5B,  
237 upper panels). However, we noticed that the absolute number of cells was generally lower in  
238  $\Delta$ *Firre* mice at every developmental stage, suggestive of a pre-thymic defect in progenitor  
239 development (Extended Data Fig. 5B, lower panels). Consistent with this, in the bone marrow  
240 compartment, we observed a significant reduction in both the frequency and number of the  
241 common lymphoid progenitors (CLPs) (lineage(lin)<sup>-</sup>Sca-1<sup>lo</sup>-c-Kit<sup>lo</sup>IL7R $\alpha$ <sup>+</sup>), a hematopoietic

242 progenitor cell type, in  $\Delta Firre$  mice ( $P=0.0069$  and  $P<0.0001$ , respectively) (Fig. 3B and Extended  
243 Data Fig. 5C).

244 To assess whether the observed defect in hematopoiesis could be due to a progenitor-  
245 intrinsic effect of *Firre* deficiency, we performed competitive chimera assays. Briefly, we isolated  
246 an HSC-enriched population ( $lin-Sca-1^+c-Kit^+CD34^{+/-}CD135^-$ ) from WT (CD45.2) and  $\Delta Firre$   
247 (CD45.2), mixed the cells separately at an equal ratio with congenic WT (CD45.1) HSCs, and  
248 transplanted this mixture into lethally irradiated CD45.1 recipient mice (Extended Data Fig. 6A,B).  
249 We assessed the long-term reconstitution ability of WT and  $\Delta Firre$  HSCs to repopulate blood cell  
250 lineages *in vivo*. We observed that  $\Delta Firre/CD45.2$ -donors had reduced frequencies of CD4 and  
251 CD8 T-cells ( $n=10$ ,  $P=0.0028$  and  $P=0.0051$ ), B-cell ( $n=10$ ,  $P=0.0114$ ), and NK cell ( $n=10$ ,  $P=0.0068$ )  
252 populations in the peripheral blood of recipient mice compared to WT/CD45.2-donors, suggesting  
253 that  $\Delta Firre$ -donors were markedly outcompeted at repopulating the blood (Extended Data Fig.  
254 6C). These data are consistent with a progenitor-intrinsic role for *Firre* in hematopoiesis.

255 In contrast to the  $\Delta Firre$  model, mice overexpressing *Firre* RNA in the WT background  
256 (*Firre*<sup>OE</sup>), had normal frequencies of CD4, CD8 and B cells, but had a significant reduction in the  
257 frequency of NK cells ( $P=0.0043$ ) in the peripheral blood compared to control mice (Fig. 3C,  
258 Extended Data Fig. 5D). A decrease in the frequency of NK cells in dox-fed *Firre*<sup>rescue</sup> mice, where  
259 only *Firre* RNA from the transgene is expressed, was also observed (Extended Data Fig. 7). In  
260 the bone marrow of dox-treated *Firre*<sup>OE</sup> mice, we did not observe significant changes in the  
261 frequencies of HSC, multipotent progenitor (MPP), common myeloid progenitor (CMP), or CLPs  
262 compared to control samples (Fig. 3C and Extended Data Fig. 5E). Taken together, these results  
263 identify cell type-specific defects during hematopoiesis, whereby alterations of *Firre* impact the  
264 ratios and numbers of particular blood cells produced during hematopoiesis.

265  
266 ***Firre* lncRNA has a trans-acting role *in vivo*.** Next, we wanted to further investigate the DNA-  
267 and RNA-mediated effects of the *Firre* locus using a cell type that was dysregulated in the  $\Delta Firre$   
268 immunophenotyping analysis. We selected to use the CLP as a model because this was the  
269 earliest hematopoietic defect identified and because *Firre* is highly expressed in this progenitor  
270 cell type. Therefore, further investigation could provide insight into the physiological effects of  
271 modulating *Firre* in a progenitor cell population. Because the  $\Delta Firre$  mouse contains a deletion  
272 that removes all potential DNA-regulatory elements, the lncRNA, and the promoter (thus removing  
273 the act of transcription), this mouse model does not allow us to distinguish between DNA- and  
274 RNA- mediated effects.

275 To directly test whether the hematopoietic CLP defect in the  $\Delta$ *Firre* mice is mediated by  
276 an RNA-based mechanism, we reasoned that overexpressing *Firre* RNA in the  $\Delta$ *Firre* background  
277 would enable us to identify RNA-mediated effects. To this end, we generated multiple cohorts of  
278 compound mice (*Firre*<sup>rescue</sup>) that contained the *Firre*<sup>OE</sup> alleles in the  $\Delta$ *Firre* background and  
279 induced transgenic *Firre* expression by placing mice on a dox-diet. From multiple cohorts of WT,  
280  $\Delta$ *Firre*, and dox-fed *Firre*<sup>rescue</sup> mice, we assessed CLP frequency by flow cytometry in total bone  
281 marrow and lineage depleted bone marrow (to enrich for hematopoietic non-lineage committed  
282 cells) (Fig. 4A).

283 Consistent with our previous data (Fig. 2B), we observed a significant decrease in the  
284 frequency of CLPs in total bone marrow from  $\Delta$ *Firre* mice ( $n=17$ , mean CLP frequency = 0.0532)  
285 compared to WT mice ( $n=16$ , mean CLP frequency = 0.0829) ( $P<0.0001$ ) (Fig. 4B). Further, in  
286 separate experimental cohorts, the frequency of CLPs in lineage-depleted bone marrow from  
287  $\Delta$ *Firre* mice was significantly decreased ( $n=9$ , mean CLP frequency = 0.3011,  $P=0.0071$ )  
288 compared to WT ( $n=9$ , mean CLP frequency = 0.2167) (Extended Data Fig. 8). Notably, the  
289 frequency of CLPs was significantly increased in dox-fed *Firre*<sup>rescue</sup> mice compared to  $\Delta$ *Firre* mice  
290 and restored to approximately that of WT in both total bone marrow ( $n=15$ , mean CLP frequency  
291 = 0.0810,  $P=0.0145$ ) (Fig. 4B) and lineage depleted bone marrow ( $n=11$ , mean CLP frequency =  
292 0.2809,  $P=0.0234$ , respectively) (Extended Data Fig. 8). Thus, induction of transgenic *Firre* RNA  
293 alone is sufficient to rescue the reduction in frequency of CLPs observed in  $\Delta$ *Firre* bone marrow.  
294 These data suggest that *Firre* RNA, rather than the DNA, exerts a biological function in the CLPs  
295 during hematopoiesis.

296  
297 **Expression of transgenic *Firre* restores gene expression programs *in vivo*.** To gain further  
298 insight into the molecular roles of *Firre* in the CLPs, we took a gene expression approach because  
299 alterations of the *Firre* locus and RNA have previously been shown to impact gene  
300 expression<sup>23,29,57</sup>. Moreover, we reasoned that we could test if changes in gene expression in the  
301 loss-of-function model could be rescued by expressing only *Firre* RNA. To this end, we isolated  
302 CLPs by fluorescence activated cell sorting (FACS) from the bone marrow of age- and sex-  
303 matched WT,  $\Delta$ *Firre*, and dox-fed *Firre*<sup>rescue</sup> mice and performed poly(A)+ RNA-seq. As expected,  
304 *Firre* RNA was not detected in the  $\Delta$ *Firre* samples, and *Firre* RNA levels were restored to levels  
305 above WT in the *Firre*<sup>rescue</sup> samples (Fig. 4C). Differential gene expression analysis between WT  
306 and  $\Delta$ *Firre* CLPs identified 89 significantly differentially expressed genes ( $FDR<0.1$ ) (Fig. 4D and  
307 Extended Data Table 10). GO analysis of the differentially expressed genes showed that deletion

308 of *Firre* in CLPs affected genes involved in lymphocyte activation, cell adhesion, and B cell  
309 activation (Fig. 4E).

310 Next, we determined if induction of *Firre* RNA in the *Firre*<sup>rescue</sup> model could rescue  
311 expression of the 89 significantly dysregulated genes found in  $\Delta$ *Firre* CLPs. We compared the  
312 CLP RNA-seq from  $\Delta$ *Firre* and *Firre*<sup>rescue</sup> mice and identified 4,656 genes with significant changes  
313 in gene expression (FDR<0.1) (Extended Data Table 11). Notably, 78 of the 89 genes that were  
314 significantly differentially expressed in  $\Delta$ *Firre* CLPs, were found to be significantly and reciprocally  
315 regulated in *Firre*<sup>rescue</sup> CLPs (P=2.2e-16, Fisher exact test) (Fig. 4D). For example, *Ccnd3*, *Lyl1*,  
316 and *Ctbp1* are significantly downregulated in  $\Delta$ *Firre* CLPs, but are found significantly upregulated  
317 in *Firre*<sup>rescue</sup> CLPs to (Fig. 4F). Further, genes such as *Maoa*, *Fam46c*, and *Icos* were found  
318 significantly upregulated in  $\Delta$ *Firre* CLPs, but their expression was significantly reduced in  
319 *Firre*<sup>rescue</sup> CLPs (Fig. 4F). We also noted that several immunoglobulin heavy and light chain variable  
320 region genes were reciprocally regulated in our analyses (Fig. 4D). Taken together, these data  
321 suggest that ectopic expression of *Firre* is sufficient to restore a gene expression program in an  
322 RNA-based manner *in vivo*.

323  
324 ***Firre* does not function in cis.** Many lncRNA loci exert function to control the expression of  
325 neighboring genes, a biological function called *cis* regulation<sup>58</sup>. This occurs through a variety of  
326 mechanisms including, *cis*-acting DNA regulatory elements, the promoter region, the act of  
327 transcription, and the lncRNA (a biological function called *cis* regulation)<sup>18,59–62</sup>. The  $\Delta$ *Firre* mouse  
328 model enables to test for a potential *cis* regulatory roles for *Firre* on the X chromosome because  
329 the knockout removes the entire *Firre* locus (Fig. 1D). To investigate local (*cis*) effects on gene  
330 expression, we generated a 2 Mb windows centered on the *Firre* locus and examined whether  
331 the neighboring genes were significantly dysregulated across 9 biological contexts.

332 Differential gene expression analysis for WT and  $\Delta$ *Firre* CLPs showed that of the 12 genes  
333 within a 2 Mb window (excluding *Firre*), none were differentially expressed (Fig. 4G). Consistent  
334 with this finding, we did not observe significant changes in gene expression (2 Mb windows  
335 centered on the *Firre* locus) in seven of the eight embryonic tissues (Fig. 4G and Extended Data  
336 Fig. 9A-F). Indeed, we observed one instance of differential expression in one embryonic tissue  
337 (*Hs6st2* was slightly but significantly downregulated in the embryonic forebrain, -0.38 log<sub>2</sub> fold  
338 change, FDR<0.05) (Extended Data Fig. 9A-F). These data demonstrate that the *Firre* locus does  
339 not exert a local effect on gene expression *in vivo*, and suggest that the *Firre* lncRNA regulates  
340 gene expression in a *trans*-based manner. Collectively, our study investigates the roles of DNA



341 and RNA at the *Firre* locus *in vivo* and genetically defines that the *Firre* locus produces as a *trans*-  
342 acting lncRNA molecule in a hematopoietic context.

343

344

345

## 346 **DISCUSSION**

347 Classic models used to study noncoding RNAs – ribosomal RNAs, small nucleolar RNAs,  
348 tRNAs, and telomerase RNA component (TERC) – have demonstrated that these RNAs species  
349 serve important cellular functions. This core of possible RNA biology has been greatly expanded  
350 by studies that have identified tens-of-thousands of lncRNAs<sup>39,40,63</sup>. Indeed, subsequent molecular  
351 and genetic interrogation of lncRNA loci have identified diverse molecular roles and biological  
352 phenotypes. However, lncRNA loci potentially contain multiple modes that can exert function,  
353 including DNA regulatory elements (including the promoter), the act of transcription, and the  
354 lncRNA. Therefore, attributing an RNA-based role to a lncRNA locus requires the development of  
355 multiple genetic models to determine the activities and contributions of potential regulatory  
356 modalities<sup>20,21,59</sup>.

357 In this study, we developed three genetic models in mice for the syntenically conserved  
358 lncRNA *Firre*: loss-of-function, overexpression, and rescue. Notably, we report that deletion of  
359 the *Firre* locus does not impact survival in mice, or despite escaping XCI, skew the sex ratio of  
360 progeny. We leveraged the genetic models to discriminate between DNA- and RNA-mediated  
361 effects *in vivo*. We determined that modulating *Firre* directs cell-specific defects during  
362 hematopoiesis, potentiates the innate immune response upon exposure to LPS, and can restore  
363 gene expression programs – all of which have an RNA-based functional modality. We also  
364 conclude that the *Firre* locus does not have a local *cis*-regulatory effect on gene-expression  
365 across numerous tissues. Together, by using multiple genetic and molecular approaches we  
366 identified that *Firre* produces a *trans*-acting lncRNA in a hematopoietic context. There are several  
367 important implications for these results.

368 First, our study indicates that *Firre* has *trans* RNA-based activity *in vivo*, and thus extends  
369 previous reports that have suggested RNA-based roles for *Firre* in cell culture models<sup>34,47</sup>. By  
370 using compound genetic approaches, we found that overexpression of *Firre* from a transgene in  
371 the *Firre*-deficient background was sufficient to rescue physiological and molecular phenotypes  
372 in  $\Delta$ *Firre* CLPs *in vivo*. We speculate that early hematopoietic progenitor cells may represent a  
373 unique context to study the role(s) of *FIRRE/Firre*. In humans, *FIRRE* is expressed as both circular  
374 (circ-*FIRRE*) and linear forms in hematopoietic cells, and circ-*FIRRE* is abundant in all progenitor



375 cell types except for the CLPs<sup>64</sup>. More studies will be needed to determine the functional  
376 differences between linear and circular isoforms of *Firre* *in vivo*.

377 Second, we observed that overexpression of *Firre* RNA in an endotoxic shock model  
378 potentiated the innate immune response *in vivo*. Our findings suggest that ectopic or high levels  
379 *Firre* lncRNA could be important for regulating the innate immune response. Consistent with our  
380 findings, modulating the levels of human and mouse *FIRRE/Firre* RNA in human intestinal  
381 epithelial and mouse macrophage cell lines perturbed the mRNA levels of inflammatory genes,  
382 including IL12-p40<sup>34</sup>. Interestingly, we identified increased levels of IL12-p40 protein in the serum  
383 from *Firre*<sup>OE</sup> mice upon exposure to LPS. We speculate that *Firre* could be important in setting  
384 functional thresholds for cells. For example, *FIRRE* is not only significantly increased in certain  
385 cancers<sup>38</sup>, but high levels of *FIRRE* expression have been significantly associated with more  
386 aggressive disease and poor survival in patients with large B-cell lymphoma<sup>36</sup>.

387 Finally, our study suggests that *Firre* does not have a *cis*-regulatory role on gene  
388 expression *in vivo*. Upon deletion of the *Firre* locus and its promoter region we observed global  
389 changes in gene expression. Yet, we did not find changes in local gene expression (2 Mb window)  
390 at the *Firre* locus in eight embryonic tissues and in CLPs. Thus, potential DNA-regulatory  
391 elements, the lncRNA, the promoter, and the act of transcription appear to not have regulatory  
392 roles on neighboring gene expression in the nine biological contexts (8 embryonic and 1 cell type)  
393 analyzed in this study. Moreover, we observed that deletion of *Firre* *in vivo* does not perturb *Xist*  
394 RNA expression in eight embryonic tissues and does not affect random XCI in MEFs, consistent  
395 with a previous study using cell culture models<sup>29</sup>. Together, these data are notable because *cis*-  
396 acting mechanisms are speculated to be common feature at lncRNA loci<sup>65</sup>. While we did not find  
397 any evidence for *cis*-activity at the *Firre* locus *in vivo*, a previous study from our group found active  
398 DNA elements within the *Firre* locus using a cell-based enhancer reporter assay in 3T3 cells<sup>22</sup>.  
399 We speculate that these candidate DNA regulatory elements are likely to regulate the *Firre* locus  
400 rather than neighboring genes, as we did not find evidence of dysregulation in gene expression  
401 for neighboring genes when the locus was deleted *in vivo*.

402 In summary, we have examined the role of *Firre* in the context of hematopoiesis in order  
403 to test DNA- and RNA-mediated effects. This study does not exclude that *Firre* could be  
404 functioning elsewhere, and even by other molecular modalities. Indeed, we identified that *Firre* is  
405 abundantly expressed in a number of tissues, therefore going forward it will be important to  
406 investigate the potential role(s) of *Firre* in other biological contexts as well as in pathological  
407 disease. Our findings provide evidence that the X chromosome lncRNA locus *Firre* has a role in

408 hematopoiesis that is mediated by a *trans*-acting RNA, and further highlights the biological  
409 importance of lncRNA-based machines *in vivo*.

410

411

412

## 413 **METHODS**

414 **Mouse care and ethics statement.** Mice used in these studies were maintained in a pathogen-  
415 specific free facility under the care and supervision of Harvard University's Institutional Animal  
416 Care Committee.

417

418 **Mouse strains and genotyping.** *Firre*<sup>floxed</sup> mice were generated from 129/C57 F1 hybrid mouse  
419 embryonic cells as previously described<sup>23</sup>. Briefly, sequential targeting was used to insert a floxed-  
420 *neomycin*-floxed cassette in the 5' end of the *Firre* locus between nucleotides 4790843-4790844  
421 (mm9) and a floxed-*hygromycin*-floxed cassette was inserted into the 3' end of the *Firre* locus  
422 between nucleotides 47990293-47990294 (mm9) (Extended Data Fig. 1A). 129/C57 F1 hybrid  
423 cells containing the *Firre*<sup>floxed</sup> allele were injected into 129/C57 blastocysts (Harvard Genome  
424 Modification Facility). Transgenic mice were screened for the *Firre*<sup>floxed</sup> allele by PCR genotyping.  
425 To generate a deletion of the *Firre* locus, female *Firre*<sup>floxed</sup> mice were mated to a male *B6.C-*  
426 *Tg(CMV-Cre)1Cgn/J* mouse<sup>46</sup> (Jackson Lab, 006054). Tail biopsies were collected from the  
427 progeny and were genotyped for WT, knockout, neomycin, hygromycin, and cre alleles (Extended  
428 Data Fig. 1B). Female mice heterozygous for the *Firre* deletion were subsequently mated to  
429 C57BL/6J mice. *Firre* WT and  $\Delta$ *Firre* mice used in this study are from the F3 generation.

430 To generate an inducible *Firre*-overexpressing allele in mice (tg(*Firre*)), we cloned a *Firre*  
431 cDNA into a Tet-On vector (pTRE2) where the beta globin intron sequence was removed. We  
432 next used both EcoRI and NheI restriction enzymes to digest the cassette containing the tet-  
433 responsive element, CMV minimal promoter, *Firre* cDNA, and beta globin poly(A) terminator. This  
434 cassette was injected into the pronucleus of C57BL/6J zygotes (Harvard Genome Modification  
435 Facility). Male founder mice containing the tg(*Firre*) cassette were identified and individually  
436 mated to female C57BL/6J mice (Jackson Laboratory, 000664). To overexpress tg(*Firre*) F2 and  
437 F3 generation females were mated to male B6N.FVB(Cg)-Tg(CAG-rtTA3)4288Slowe/J (rtTA)  
438 mice (Jackson Laboratory, 016532) and at the plug date females were either put on a normal diet  
439 or 625 mg/kg doxycycline-containing food (Envigo, TD.01306) until experimental end points. A  
440 colony of male rtTA mice were maintained by breeding to C57BL6/J females for up to 4  
441 generations.

442 Genotyping for mice was performed on tissue collected at P7. Primers used for  
443 genotyping: *Firre* wild-type allele, F-GGAGGAGTGCTGCTTACTGG, R-  
444 TCTGTGAGCCACCTGAAATG;  $\Delta$ *Firre* allele, F- TCACAATGGGCTGGGTATTCTC, R-  
445 CCTGGGTCCTCTATAAAAGCAACAG; *neomycin*, F- GACCACCAAGCGAAACATC, R-  
446 CTCGTCAAGAAGGCGATAGAA; hygromycin, F-CGGAAGTGCTTGACATTGGG, R-  
447 CGTCCATCACAGTTTGCCAGTG; *Cre*, F- TAATCCATATTGGCAGAACG, R-  
448 ATCAATCGATGAGTTGCTTC; *Sry*, F- TTGTCTAGAGAGCATGGAGGGCCATGTCAA, R-  
449 CCACTCCTCTGTGACACTTTAGCCCTCCGA; *tg(Firre)* allele, F: TACCACTCCCTATCAGTGA,  
450 R: CGGCTTCATCTTCAGTCCTC; and the *rtTA* allele, F: AGTCACTTGTCACACAACG, R:  
451 CTCTTATGGAGATCCCTCGAC. Additional genotyping was performed by Transnetyx using real-  
452 time PCR.

453  
454 **Cytokine analysis and *in vivo* endotoxin challenge.** To investigate the cytokine response *in*  
455 *vivo*, we used two different preparations of LPS from *Escherichia coli* (*E. coli*) O111:B4. (Sigma,  
456 L2630) and Ultrapure LPS, *E. coli* O111:B4 (InvivoGen, tlr1-3pelps) and dissolved in 0.9% saline  
457 solution (Teknova, S5825). We administered either 0.9% saline or 5 mg/kg broad-acting LPS  
458 (Sigma, L2630) by i.p. injection using a 30G needle (BD insulin syringes, 328411) to mice cohorts  
459 8 to 10 weeks old (WT,  $\Delta$ *Firre*, *Firre*<sup>OE</sup> no dox, and dox fed *Firre*<sup>OE</sup>). We also administered either  
460 a 0.9% saline or a 5 mg/kg dose of LPS that is TLR4-specific (InvivoGen, tlr1-3pelps) by i.p.  
461 injection in mice 5 to 10 weeks old (WT, *Firre*<sup>OE</sup> no dox, and dox fed *Firre*<sup>OE</sup>). At 5 hours post i.p.  
462 injection, mice were euthanized and peripheral blood was collected by cardiac puncture and  
463 allowed to clot for 30 minutes at room temperature with gentle rotation. After clotting, samples  
464 were centrifuged at 1000 x g for 10 minutes at 4°C and serum was collected. Cytokine analysis  
465 was performed on serum diluted 2-fold in PBS pH7.4 (Eve Technologies, Chemokine Array 31-  
466 Plex). Measurements within the linear range of the assay are reported.

467 Endotoxin survival experiments were performed over two independent experiments using  
468 mice 9 to 16 weeks old: WT (mean age = 12.9 weeks),  $\Delta$ *Firre* (mean age = 16 weeks), *Firre*<sup>OE</sup> no  
469 dox (mean age = 13.6 weeks), and dox fed *Firre*<sup>OE</sup> (mean age = 13.7 weeks). Saline control group  
470 consisting of WT,  $\Delta$ *Firre*, and *Firre*<sup>OE</sup> mice. 0.9% saline or 5 mg/kg LPS (InvivoGen, tlr1-3pelps)  
471 was prepared as described above and administered by i.p. injection and mice were monitored for  
472 moribund survival over 6 days. Mice were housed at a density of 3 to 5 mice per cage containing:  
473 Anderson's Bed (The Andersons, Inc), Enviro-Dri (Shepherd Specialty Papers), compressed 2" x  
474 2" cotton nestlet (Ancare), and a mouse hut (BioServ). The following supportive care was provided  
475 during the duration of the experiments: hydrogel, a small cup containing powdered diet mixed with

476 water, and a heating pad (5" x 8.6" x 6") was placed externally on the bottom of the cage  
477 (Kobayashi).

478

479 **Whole-mount *in situ* hybridization.** We generated an antisense digoxigenin-labeled antisense  
480 riboprobe against *Firre* from a 428bp sequence (Extended Data Fig. 1C) corresponding to the 5'  
481 end of the *Firre* transcript. *In situ* hybridization was performed on a minimum of three embryos  
482 per stage and/or genotype. For whole-mount staining, we fixed embryos in 4% paraformaldehyde  
483 for 18 hours at 4°C, followed by 3 washes in 1x PBS for 10 minutes at room temperature. We  
484 then dehydrated the embryos them for 5 min at room temperature in a series of graded methanol  
485 solutions (25%, 50%, 75%, methanol containing 0.85% NaCl, and 100% methanol). Embryos  
486 were then stored in 100% methanol at -20°C. We then rehydrated embryos through a graded  
487 series of 75%, 50%, 25%, methanol/ 0.85% NaCl 5 min incubations at room temperature and then  
488 washed in twice in 1x PBS with 0.1% Tween-20 (PBST). Embryos were treated with 10mg/mL  
489 proteinase K in 1x PBST for 10 minutes (E8.0, E9.5) or 30 minutes (E10.5, E11.5 and E12.5).  
490 Samples were fixed again in 4% paraformaldehyde/0.2% glutaraldehyde in PBST for 20 minutes  
491 at room temperature and washed in twice in 1x PBST. We then incubated samples in pre-  
492 hybridization solution for 1 hour at 68°C and then incubated samples in 500 ng/mL of *Firre*  
493 antisense riboprobe at 68°C for 16 hours. Post hybridization, samples were washed in stringency  
494 washes and incubated in 100 µg/mL RNaseA at 37°C for 566 1 hour. Samples were washed in  
495 1X maleic acid buffer with 0.1% Tween-20 (MBST) and then incubated in Roche Blocking  
496 Reagent (Roche, 1096176) with 10% heat inactivated sheep serum (Sigma, S2263) for 4 hours  
497 at room temperature. We used an anti-digoxigenin antibody (Roche, 11093274910) at 1:5000 and  
498 incubated the samples for 18 hours at 4°C. Samples were washed 8 times with MBST for 15 min,  
499 5 times in MBST for 1 hour, and then once in MBST for 16 hours at 4°C. To develop, samples  
500 were washed 3x for 5 min at room temperature with NTMT solution (100 mM NaCl, 100 mM Tris-  
501 HCl (pH 9.5), 50 mM MgCl<sub>2</sub>, 0.1% Tween-20, 2 mM levamisole). The *in situ* hybridization signal  
502 was developed by adding BM Purple (Roche, 11442074001) for 4, 6, 8, and 12 hours. After the  
503 colorimetric development, samples were fixed in 4% paraformaldehyde and cleared through a  
504 graded series of glycerol/1X PBS and stored in 80% glycerol. Embryos were imaged on a Leica  
505 M216FA stereomicroscope (Leica Microsystems) equipped with a DFC300 FX digital imaging  
506 camera.

507

508 **RNA-seq in embryonic tissues preparation and analysis.** For WT and  $\Delta$ *Firre* RNA-seq in  
509 embryonic tissues we dissected tissues (forebrain, midbrain, heart, lung, liver, forelimb, hindlimb,

510 and presomitic mesoderm) from E11.5 embryos (44-48 somites) that were collected from matings  
511 between either male WT and female *Firre*<sup>+/-</sup> or male  $\Delta$ *Firre* and female *Firre*<sup>+/-</sup> mice. Tissues were  
512 immediately homogenized in Trizol (Invitrogen) and total RNA was isolated using RNeasy mini  
513 columns (Qiagen) on a QIAcube (Qiagen). Samples were genotyped for the WT,  $\Delta$ *Firre*, and sex  
514 alleles (Extended Data Fig. 1A,B). For each tissue, we generated the following libraries: WT male  
515 ( $n=3$ ), WT female ( $n=3$ ),  $\Delta$ *Firre* male ( $n=3$ ), and  $\Delta$ *Firre* female ( $n=3$ ). Poly(A)+ RNA-seq libraries  
516 were constructed using TruSeq RNA Sample Preparation Kit v2 (Illumina). The libraries were  
517 prepared using 500ng of total RNA as input, with the exception of the lung (200ng) and the  
518 presomitic mesoderm (80ng), and with a 10-cycle PCR enrichment to minimize PCR artifacts. The  
519 indexed libraries were pooled in groups of six, with each pool containing a mix of WT and  $\Delta$ *Firre*  
520 samples. Pooled libraries were sequenced on an Illumina HiSeq 2500 in rapid-run mode with  
521 paired-end reads.

522 Reads were mapped to the mm10 mouse reference genome using TopHat v2.1.1 with the  
523 flags: "--no-coverage-search --GTF gencode.vM9.annotation.gtf" where this GTF is the Gencode  
524 vM9 reference gene annotation available at gencodegenes.org. Cufflinks v2.2.1 was used to  
525 quantify gene expression and assess the statistical significance of differences between  
526 conditions. Cuffdiff was used to independently compare the WT and  $\Delta$ *Firre* samples and from  
527 each tissue and sex, and genes with FDR<0.05 were deemed significant (Extended Data Tables  
528 2-9).

529  
530 **RNA-seq in CLPs preparation and analysis.** We isolated CLPs (Lin-Sca-1<sup>lo</sup>cKit<sup>lo</sup>IL7R $\alpha$ <sup>+</sup>) by  
531 fluorescence activated cell sorting (FACS) from mice 27 to 32 weeks old: WT ( $n=4$ , mean age =  
532 31 weeks),  $\Delta$ *Firre* ( $n=4$ , mean age = 30.4 weeks), and dox fed *Firre*<sup>rescue</sup> ( $n=4$ , mean age = 29.3  
533 weeks). CLPs were directly sorted into TRizol. RNA was isolated using RNeasy micro columns  
534 (Qiagen) on a QIAcube (Qiagen) and we quantification the concentration and determined the RNA  
535 integrity using a BioAnalyzer (Agilent). Poly(A)+ RNA-seq libraries were constructed using CATS  
536 RNA-seq kit v2 (Diagenode, C05010041). Pooled libraries were sequenced on an Illumina HiSeq  
537 2500 in rapid-run mode with paired-end reads.

538 The adapter-trimmed reads were mapped to the mm10 mouse reference genome using  
539 TopHat v2.1.1 with the flags: "--no-coverage-search --GTF gencode.vM9.annotation.gtf"  
540 (Gencode vM9 reference gene annotation) FeatureCounts and R-package, DESeq2, were used  
541 to quantify gene expression and assess the statistical significance of differences between  
542 conditions<sup>66,67</sup> and the p-value of comparisons were empirically calculated by using fdrtools<sup>68</sup>.  
543 Genes with an FDR<0.1 were deemed significant in a comparison between wildtype and  $\Delta$ *Firre*

544 (Extended Data Table 10) and genes with an FDR<0.1 in the  $\Delta$ *Firre* and *Firre*<sup>rescue</sup> comparison  
545 were deemed significant (Extended Data Table 11).

546  
547 **qRT-PCR.** Embryonic tissues were homogenized in Trizol (Invitrogen) and total RNA was isolated  
548 using RNeasy mini columns (Qiagen) on a QIAcube (Qiagen). 300ng of total RNA was used as  
549 input to synthesize cDNA (SuperScript IV VILO Master Mix, Invitrogen, 11756050). Primers used  
550 qRT-PCR experiments: F\_b-act: GCTGTATTCCCCTCCATCGTG, R\_b-act:  
551 CACGGTTGGCCTTAGGGTTTCAG; F\_Firre: AAATCCGAGGACAGTCGAGC, R\_Firre:  
552 CCGTGGCTGGTGACTTTTTG. Experiments were performed on a Viia7 (Applied Biosciences).  
553 qRT-PCR data was analyzed by the  $\Delta\Delta$ Ct method.

554  
555 **Distribution of *Firre* expression across wild-type tissues.** For each of the eight WT embryonic  
556 tissues, FPKM estimates of all protein coding or noncoding genes were aggregated and filtered  
557 for expression > 1FPKM. Density plots were generated using ggplot2 (geom\_density()). The  
558 distributions of wildtype FPKM estimates for these transcriptional types are indicated by black line  
559 for protein-coding and gray line for non-coding expression.

560  
561 **Flow Cytometry analysis.** Age and sex-matched adult mice were used in all flow cytometry  
562 experiments. Zombie Aqua Fixable Viability Kit (Biolegend, 423101) was used as a live-dead  
563 stain. CountBright Absolute Counting Beads (Invitrogen, C36950) were added to bone marrow  
564 and thymi samples in order to enumerate cell populations.

565 For cell analysis, peripheral blood was collected by cardiac puncture. The following  
566 antibodies were added (1:100) to each sample and incubated for 30 minutes at room temperature  
567 Alexa Fluor 700 anti-mouse CD8a (Biolegend, 100730), PE/Dazzle-594 anti-mouse CD4  
568 (Biolegend, 100456), APC anti-mouse CD19 (Biolegend, 115512), Alexa Fluor 488 anti-mouse  
569 NK-1.1 (Biolegend, 108718), PE anti-mouse CD3 (Biolegend, 100205), PE/Cy7 anti-  
570 mouse/human CD44 (Biolegend, 103030), eFluor 450 anti-Mouse CD62L (L-Selectin,  
571 eBiosciences, 48-0621-82), and TruStain FcX (anti-mouse CD16/32) antibody (1:50) (Biolegend,  
572 101319). Red blood cells were then lysed for 15 minutes at room temperature using BD FACS  
573 Lysing Solution (BD, 349202). Cells were washed twice in 1x PBS with 1% BSA and then  
574 resuspended in 1% paraformaldehyde or 1x PBS with 0.2% BSA.

575 Thymi were collected and homogenized in ice cold PBS over a 40 micron filter. The cells  
576 were incubated with the following antibodies (1:100) for 30 minutes at room temperature: Alexa  
577 Fluor 488 anti-mouse CD25 (Biolegend, 102017), PE/Cy7 anti-mouse/human CD44 (Biolegend,



578 103030), PE anti-mouse TCR  $\beta$  chain (Biolegend, 109208), APC anti-mouse/human  
579 CD45R/B220 (Biolegend, 103212), eFluor 450 anti-Mouse CD69 (eBiosciences, 48-069182),  
580 Alexa Fluor 700 anti-mouse CD8a (Biolegend, 100730), and PE/Dazzle-594 anti-mouse CD4  
581 (Biolegend, 100456). Cells were washed twice in 1x PBS with 1% BSA and then resuspended in  
582 1% paraformaldehyde.

583 Bone marrow was collected from both femurs and tibias (four bones total per mouse) by  
584 removing the end caps and flushing with DMEM (Gibco, 11995-073) containing 5% FBS (Gibco,  
585 26140079) and 10mM EDTA. Cells were then pelleted, re-suspended and passed through a 70  
586 micron filter. The resulting single cell suspension was then incubated with the following antibodies  
587 (1:100) for 60 minutes on ice: Alexa Fluor 700 anti-Mouse CD16/CD32 (eBiosciences, 65016182),  
588 PE/Cy7 anti-mouse CD127 (IL-7R $\alpha$ ) (Biolegend, 135014), Alexa Fluor 488 anti-mouse CD117 (c-  
589 Kit) (Biolegend, 105816), PE/Dazzle-594 anti-mouse Ly-6A/E (Sca-1) (Biolegend, 108138),  
590 Pacific Blue anti-mouse Lineage Cocktail (Biolegend, 135306), PE anti-mouse CD135  
591 (Biolegend, 135306), and APC anti-mouse CD34 (Biolegend, 128612). Red blood cells were then  
592 lysed for 15 minutes at room temperature using BD FACS Lysing Solution (BD, 349202) or BD  
593 Pharm Lyse (BD, 555899). Cells were washed twice in 1x PBS with 1% BSA and then  
594 resuspended in 1% paraformaldehyde or 1x PBS with 0.2% BSA.

595 Flow cytometry was performed on a LSR-II (BD) and the gating was performed using  
596 FlowJo software (Treestar) using the following criteria (applied to live singlets): CD4 T cells  
597 (CD3+CD4+CD8-CD19-; CD8 T cells (CD3+CD8+CD4-CD19-); NK cells (NK1.1+B220-CD3-); B  
598 cells (CD19+CD3-); double negative (DN) (B220-CD4-CD8-CD25<sup>var</sup>CD44<sup>var</sup>); double positive  
599 (DP) (CD4+CD8+B220-); single positive (SP) (CD8, CD8+CD4-B220-); single positive (SP) (CD4,  
600 CD4+CD8-B220-); hematopoietic stem cells (HSC) (LSK [Lin-, Sca-1+, c-Kit+]-CD34+-CD135-);  
601 multipotent progenitors (MPP) (LSK-CD34+CD135+); common lymphoid progenitors (CLP) (Lin-  
602 Sca-1<sup>lo</sup>c-Kit<sup>lo</sup>IL7R $\alpha$ <sup>+</sup>); and common myeloid progenitors (CMP) (CD34+CD16/32-). Negative  
603 gates were set using fluorescence-minus-one controls (FMO).

604  
605 **Competitive HSC transplant assay.** Bone marrow from age- and sex-matched mice was  
606 collected and pooled with like genotypes (as described in flow cytometry analysis section) from  
607 mice that were 8 to 9 weeks in age: PepBoy/CD45.1 ( $n=3$  females per experiment; mean age =  
608 9 weeks) (Jackson Laboratory, 002014), *Firre* WT/CD45.2 ( $n=3$  females per experiment mean  
609 age = 8.9 weeks), and  $\Delta$ *Firre*/CD45.2 ( $n=3$  females per experiment; mean age = 8.6 weeks). Bone  
610 marrow was lineage depleted according to the manufacture protocol (MiltinyiBiotec, 130-042-  
611 401), and cell marker surface staining was performed (as described for bone marrow in flow



612 cytometry analysis section). Red blood cells were then lysed for 15 minutes at room temperature  
613 using BD Pharm Lyse (BD, 555899). Cells were washed twice in 1x HBSS with 5% FBS and 2  
614 mM EDTA. We then double sorted lineage depleted cells for an HSC-enriched population (Lin<sup>-</sup>  
615 Sca-1<sup>+</sup>c-Kit<sup>+</sup>CD34<sup>+</sup>CD135<sup>-</sup>) into 2% FBS in HBSS using fluorescent activated cell sorting (FACS)  
616 (BD Aria). Recipient mice, PepBoy/CD45.1 ( $n=10$  males per experiment; mean age = 8.6 weeks),  
617 were lethally irradiated using a split 9.5 $\gamma$  split dose (3 hours apart). *Firre* WT and  $\Delta$ *Firre* HSCs  
618 were mixed at a 1:1 ratio to PepBoy/CD45.1 HSCs and 100  $\mu$ l containing 4,000 cells were  
619 transplanted by retro-orbital injection using 30-gauge insulin syringes (BD, 328411) into the  
620 lethally irradiated recipients. 48 hours post-transplant, 100,000 helper marrow cells from male  
621 PepBoy/CD45.1 were transplanted by retro-orbital injection into each experimental  
622 PepBoy/CD45.1 male recipient mouse.

623  
624 **MEF preparations and culture.** We generated *Firre* WT, *Firre* knockout, and *Firre*<sup>rescue</sup> MEFs at  
625 E13.5 from intercrosses between male *Firre*<sup>-/-</sup> with female *Firre*<sup>+/-</sup> and male *Firre*<sup>rescue</sup> with female  
626 *Firre*<sup>-/-</sup>. Individual embryos were dissected into 1x phosphate-buffered saline (PBS) and were  
627 eviscerated, and the head, forelimbs, and hindlimbs were removed. Embryo carcasses were  
628 placed into individual 6 cm<sup>2</sup> tissue culture plates containing 1 mL of pre-warmed 37°C TrypLE  
629 (Thermo Fisher, 12604013) and were incubated at 37°C for 20 min. Embryos were dissociated  
630 by gently pipetting using a P1000 tip and MEF media was added. Cells were cultured for 5 to 7  
631 days and cryostocks of individual lines were generated. Subsequent experiments were performed  
632 from thaws from the cryostocks up to passage 3. MEFs were genotyped for *Firre* WT, knockout,  
633 rtTA, tg(*Firre*), and sry alleles. MEF culture media: 1x Dulbecco's modified Eagle's medium  
634 (DMEM) (Invitrogen 11965-118), 10% fetal bovine serum (Gibco, 10082139), L-glutamine  
635 (Thermo Fisher, 25030081), and penicillin/streptomycin (Thermo Fisher, 15140122).

636  
637 ***Firre* RNA FISH.** *Firre* WT,  $\Delta$ *Firre*, and *Firre*<sup>rescue</sup> MEFs were plated at a density of 50,000 cells  
638 per well onto round glass cover slips in a 24-well plate. *Firre*<sup>rescue</sup> MEFs were cultured with either  
639 2  $\mu$ g/mL dox (Sigma, D9891) or vehicle (ddH<sub>2</sub>O) for 24 hours. Replicate wells were processed for  
640 either RNA FISH or to isolate RNA for *Firre* induction analysis by qRT-PCR. RNA FISH using  
641 oligo probes was performed as previously described<sup>69</sup>. Briefly, *Firre* oligo probes were designed  
642 using Primer3 (<http://frodo.wi.mit.edu/primer3/>) and synthesized by Integrated DNA  
643 Technologies. After Amine-ddUTP (Kerafast) was added to 2 pmol of pooled oligos by terminal  
644 transferase (New England Biolabs), oligos were labeled with Alexa647 NHS-ester (Life  
645 Technologies) in 0.1 M sodium borate. Cells grown on glass coverslips were rinsed in PBS and

646 fixed in 4% paraformaldehyde. After permeabilization in 0.5% Triton X-100 at room temperature,  
647 cells were washed in PBS and dehydrated in a series of increasing ethanol concentrations. 6  
648 labeled oligo probes were added to hybridization buffer containing 25% formamide, 2X SSC, 10%  
649 dextran sulfate, and 1 mg/mL yeast tRNA. RNA FISH was performed in a humidified chamber at  
650 42°C for 4 hours. After being washed three times in 2X SSC, cells were mounted for wide-field  
651 fluorescent imaging or dehydrated for STORM imaging. Nuclei were counter-stained with Hoechst  
652 33342 (Life Technologies). The following pooled oligos against *Firre* were used: (1)  
653 AGCAGCAAATCCCAGGGGCC, (2) TTCCTCATTCCCCTTCTCCTGG, (3)  
654 CCCATCTGGGTCCAGCAGCA, (4) ATCAGCTGTGAGTGCCTTGC, (5)  
655 TCCAGTGCTTGCTCCTGATG, (6) GCCATGGTCAAGTCCTGCAT

656

### 657 ***Firre* DNA/RNA and *Xist* RNA co-FISH**

658 Primary MEF cells were trypsinized and cytospun to glass slides. After brief air drying, cells  
659 were incubated in PBS for 1min, CSK/0.5% Triton X-100 for 2 min on ice, and CSK for 2 min on  
660 ice. Cells were fixed in 4% formaldehyde in PBS for 10 min at RT and washed twice in PBS. After  
661 dehydrated through series of EtOH, cells were subject to hybridization at 37°C O/N with denatured  
662 digoxigenin-labeled *Xist* probe (50% formamide, 2X SSC, 10% dextran sulfate, 0.1 mg/mL CoT1  
663 DNA). Cells were washed in 50% formamide, 2X SSC at 37 ° C and in 2X SSC at RT, three times  
664 each. RNA FISH signal was detected by incubating FITC-labeled anti-digoxigenin antibody  
665 (Roche) in 4X SSC, 0.1% Tween-20 at 37 °C for 1 hour and followed by washing in 4X SSC, 0.1%  
666 Tween-20 at 37 °C three times. Cells were fixed again in 4% formaldehyde in PBS for 10 min and  
667 washed twice in PBS. Cellular RNAs were removed by RNase A (Life Technology) in PBS at  
668 37°C. After dehydrated through series of EtOH, cells were sealed in hybridization buffer (50%  
669 formamide, 2X SSC, 10% dextran sulfate, 0.1 mg/mL CoT-1 DNA) containing Cy3-labeled *Firre*  
670 probe (Fosmid WI-755K22). Chromosomal DNA and probes were denatured at 80°C for 15 min  
671 and allowed to renature by cooling down to 37° C O/N. Cells were washed in 50% formamide, 2X  
672 SSC at 37°C and in 2X SSC at RT, three times each. Nuclei were counter-stained with Hoechst  
673 33342 (Life Technology). Imaging was performed on Nikon 90i microscope equipped with a  
674 60X/1.4 N.A. VC objective lens, Orca ER camera (Hamamatsu) and Volocity software (Perkin  
675 Elmer). All probes were prepared by nick translation using DNA polymerase I (New England  
676 Biolab), DNase I (Promega), and Digoxigenin-dUTP (Roche), or Cy3-dUTP (Enzo Life Sciences)

677

678 **Skeletal preparations.** WT and  $\Delta$ *Firre* E18.5 embryos were dissected and eviscerated. Samples  
679 were fixed in 100% ethanol for 24 hours at room temperature. Embryos were then placed in 100%

680 acetone for 24 hours at room temperature and then incubated in staining solution (0.3% alcian  
681 blue 8GS (Sigma) and 0.1% Alizarin Red S (Sigma) in 70% ethanol containing 5% acetic acid)  
682 for three days at 37°C. Samples were then rinsed with distilled water and then placed in 1%  
683 potassium hydroxide at room temperature for 24 hours. Samples were then cleared in a series of  
684 1% potassium hydroxide / 20%, 50%, and 80% glycerol.

685

686

687

## 688 **ACKNOWLEDGEMENTS**

689 We thank Dr. Martin Sauvageau for providing a *Firre* clone to generate a riboprobe; Dr. Diana  
690 Sanchez for assistance in the mouse facility; Dr. Susan Carpenter, Dr. Kate Pritchett-Corning,  
691 and Elektra Robinson for discussions on the LPS study; Joyce LaVecchio and Silvia Ionescu in  
692 the HSCRb flow cytometry core for FACS assistance; the Harvard Bauer Core for sequencing;  
693 Dr. Marta Mele for initial optimization for RNA-seq analysis; and Dr. Laurie Chen and Dr. Lin Wu  
694 at the Harvard Genome Modification Facility. This research was supported by the National  
695 Institutes of Health (NIH) General Medical Sciences postdoctoral fellowship award  
696 1F32GM122335-01A1 (to J.P.L) and support from NIH National Heart, Lung, and Blood Institute  
697 T32HL007893; NIH postdoctoral fellowship F32AG050395 (to J.M.G.); R.A.F is supported by the  
698 Howard Hughes Medical Institute; NIH RO1 AG048917 and the Dean's Initiative Award Program  
699 for Innovation Grants in the Basic and Social Sciences (to A.J.W). the Institute of Mental Health  
700 grant R01MH102416-03 and the NIH Institute of General Medical Sciences grant P01GM099117  
701 (to J.L.R).

702

703

704

## 705 **AUTHOR CONTRIBUTIONS**

706 Study conceptualization and design: J.P.L, J.C.L, and J.L.R; *Firre* ES cell targeting: A.W., J.H.,  
707 R.A.F; Transgenic mice generation and mouse husbandry, N.C. and J.P.L; Immunophenotyping  
708 experiments: J.P.L, J.C.L, and J.M.G.; Competitive chimera design and analysis: J.M.G, J.P.L,  
709 A.J.W; Endotoxic shock experiments: J.P.L, N.C, and C.G; RNA-sequencing design and analysis:  
710 T.H, J.P.L, C.G, W.M, A.G; RNA FISH for *Firre*: H.S and J.T.L; Funding and supervision: A.J.W  
711 and J.L.R; Writing manuscript J.P.L, J.C.L, and J.L.R with input from all of the authors.

712

713

714

715 **REFERENCES**

716

- 717 1. Feng, J. *et al.* The RNA component of human telomerase. *Science (80-. )*. **269**, 1236–  
718 1241 (1995).
- 719 2. Sonenberg, N., Wilchek, M. & Zamir, A. Identification of a region in 23S rRNA located at  
720 the peptidyl transferase center. *Proc. Natl. Acad. Sci.* **72**, 4332–4336 (1975).
- 721 3. Franke, A. & Baker, B. S. The rox1 and rox2 RNAs Are Essential Components of the  
722 Compensosome, which Mediates Dosage Compensation in Drosophila. *Mol. Cell* **4**, 117–  
723 122 (1999).
- 724 4. Marahrens, Y., Panning, B., Dausman, J., Strauss, W. & Jaenisch, R. Xist-deficient mice  
725 are defective in dosage compensation but not spermatogenesis. *Genes Dev.* **11**, 156–  
726 166 (1997).
- 727 5. Bertone, P. *et al.* Global Identification of Human Transcribed Sequences with Genome  
728 Tiling Arrays. *Science (80-. )*. **306**, 2242–2246 (2004).
- 729 6. Fantom Consortium, T. The Transcriptional Landscape of the Mammalian Genome.  
730 *Science (80-. )*. **309**, 1559–1563 (2006).
- 731 7. Kapranov, P. *et al.* RNA Maps Reveal New RNA Classes and a Possible Function for  
732 Pervasive Transcription. *Science (80-. )*. **316**, 1484–1488 (2007).
- 733 8. Rinn, J. L. *et al.* The transcriptional activity of human Chromosome 22. *Genes Dev.* **17**,  
734 529–540 (2003).
- 735 9. Sauvageau, M. *et al.* Multiple knockout mouse models reveal lincRNAs are required for  
736 life and brain development. *Elife* **2**, 1–24 (2013).
- 737 10. Atianand, M. K. *et al.* A Long Noncoding RNA lincRNA-EPS Acts as a Transcriptional  
738 Brake to Restrain Inflammation. *Cell* **165**, 1672–1685 (2016).
- 739 11. Elling, R. *et al.* Genetic Models Reveal cis and trans Immune-Regulatory Activities for  
740 lincRNA-Cox2. *Cell Rep.* **25**, 1511-1524.e6 (2018).
- 741 12. Lai, K. M. V. *et al.* Diverse phenotypes and specific transcription patterns in twenty  
742 mouse lines with ablated lincRNAs. *PLoS One* **10**, 1–21 (2015).
- 743 13. Kotzin, J. J. *et al.* The long non-coding RNA Morrbid regulates Bim and short-lived  
744 myeloid cell lifespan. *Nature* **537**, 239–243 (2017).
- 745 14. Paralkar, V. R. *et al.* Unlinking an lncRNA from Its Associated cis Element. *Mol. Cell* **62**,  
746 104–110 (2016).
- 747 15. Groff, A. F., Barutcu, A. R., Lewandowski, J. P. & Rinn, J. L. Enhancers in the Peril  
748 lincRNA locus regulate distant but not local genes. *Genome Biol.* **19**, 1–14 (2018).
- 749 16. Groff, A. F. *et al.* In Vivo Characterization of Linc-p21 Reveals Functional cis-Regulatory  
750 DNA Elements. *Cell Rep.* **16**, 2178–2186 (2015).
- 751 17. Engreitz, A. J. M. *et al.* Neighborhood regulation by lncRNA promoters, transcription, and  
752 splicing. *bioRxiv* 1–15 (2016). doi:10.1101/050948
- 753 18. Latos, P. A. *et al.* Aim Transcriptional Overlap, But Not Its lncRNA Products, Induces  
754 Imprinted Igf2r Silencing. *Science (80-. )*. **338**, 1469–1472 (2012).
- 755 19. Anderson, K. M. *et al.* Transcription of the non-coding RNA upperhand controls Hand2  
756 expression and heart development. *Nature* **539**, 433–436 (2016).
- 757 20. Bassett, A. R. *et al.* Considerations when investigating lncRNA function in vivo. *Elife* **3**, 1–  
758 14 (2014).
- 759 21. Feyder, M. & Goff, L. A. Investigating long noncoding RNAs using animal models. *J. Clin.*  
760 *Invest.* **126**, 2783–2791 (2016).
- 761 22. Hacisuleyman, E., Shukla, C. J., Weiner, C. L. & Rinn, J. L. Function and evolution of  
762 local repeats in the Firre locus. *Nat. Commun.* **7**, 1–12 (2016).
- 763 23. Hacisuleyman, E. *et al.* Topological organization of multichromosomal regions by the long

- 764 intergenic noncoding RNA Firre. *Nat. Struct. Mol. Biol.* **21**, 198–206 (2014).
- 765 24. Chen, J. *et al.* Evolutionary analysis across mammals reveals distinct classes of long  
766 non-coding RNAs. *Genome Biol.* **17**, 1–17 (2016).
- 767 25. Hezroni, H. *et al.* Principles of Long Noncoding RNA Evolution Derived from Direct  
768 Comparison of Transcriptomes in 17 Species. *Cell Rep.* **11**, 1110–1122 (2015).
- 769 26. Horakova, A. H., Moseley, S. C., Mclaughlin, C. R., Tremblay, D. C. & Chadwick, B. P.  
770 The macrosatellite DXZ4 mediates CTCF-dependent long-range intrachromosomal  
771 interactions on the human inactive X chromosome. *Hum. Mol. Genet.* **21**, 4367–4377  
772 (2012).
- 773 27. Barutcu, A. R., Maass, P. G., Lewandowski, J. P., Weiner, C. L. & Rinn, J. L. A TAD  
774 boundary is preserved upon deletion of the CTCF-rich Firre locus. *Nat. Commun.* **9**, 1–11  
775 (2018).
- 776 28. Darrow, E. M. *et al.* Deletion of DXZ4 on the human inactive X chromosome alters higher-  
777 order genome architecture. *PNAS* E4504–E4512 (2016). doi:10.1073/pnas.1609643113
- 778 29. Froberg, J. E., Pinter, S. F., Kriz, A. J., Jégu, T. & Lee, J. T. Megadomains and  
779 superloops form dynamically but are dispensable for X-chromosome inactivation and  
780 gene escape. *Nat. Commun.* **9**, 1–19 (2018).
- 781 30. Berletch, J. B., Ma, W., Yang, F., Shendure, J. & Noble, W. S. Escape from X Inactivation  
782 Varies in Mouse Tissues. *PLoS Genet.* 1–26 (2015). doi:10.1371/journal.pgen.1005079
- 783 31. Yang, F. *et al.* The lncRNA Firre anchors the inactive X chromosome to the nucleolus by  
784 binding CTCF and maintains H3K27me3 methylation. *Genome Biol.* **16**, 52 (2015).
- 785 32. Yang, F., Babak, T., Shendure, J. & Distèche, C. M. Global survey of escape from X  
786 inactivation by RNA-sequencing in mouse. *Genome Res.* **20**, 614–622 (2010).
- 787 33. Sun, L. *et al.* Long noncoding RNAs regulate adipogenesis. *PNAS* **110**, 3387–92 (2013).
- 788 34. Lu, Y. *et al.* The NF- $\kappa$ B-Responsive Long Noncoding RNA FIRRE Regulates  
789 Posttranscriptional Regulation of Inflammatory Gene Expression through Interacting with  
790 hnRNPU. *J. Immunol.* **199**, 3571–3582 (2017).
- 791 35. Abe, Y. *et al.* Xq26.1-26.2 gain identified on array comparative genomic hybridization in  
792 bilateral periventricular nodular heterotopia with overlying polymicrogyria. *Dev. Med.*  
793 *Child Neurol.* **56**, 1221–1224 (2014).
- 794 36. Shi, X. *et al.* LncRNA FIRRE is activated by MYC and promotes the development of  
795 diffuse large B-cell lymphoma via Wnt/ $\beta$ -catenin signaling pathway. *Biochem. Biophys.*  
796 *Res. Commun.* **510**, 594–600 (2019).
- 797 37. Zang, Y., Zhou, X., Wang, Q., Li, X. & Huang, H. LncRNA FIRRE/NF- $\kappa$ B feedback loop  
798 contributes to OGD/R injury of cerebral microglial cells. *Biochem. Biophys. Res.*  
799 *Commun.* **501**, 131–138 (2018).
- 800 38. Yan, X. *et al.* Comprehensive Genomic Characterization of Long Non-coding RNAs  
801 across Human Cancers. *Cancer Cell* **28**, 529–540 (2015).
- 802 39. Cabili, M. *et al.* Integrative annotation of human large intergenic noncoding RNAs reveals  
803 global properties and specific subclasses. *Genes Dev.* **447**, 27–32 (2012).
- 804 40. Derrien, T. *et al.* The GENCODE v7 catalogue of human long non-coding RNAs :  
805 Analysis of their structure , evolution and expression. *Genome Res.* **22**, 1775–1789  
806 (2012).
- 807 41. Mattioli, K. *et al.* High-throughput functional analysis of lncRNA core promoters elucidates  
808 rules governing tissue-specificity. *Genome Res.* **29**, 344–355 (2019).
- 809 42. Molyneaux, B. J. *et al.* DeCoN: Genome-wide Analysis of In Vivo Transcriptional  
810 Dynamics during Pyramidal Neuron Fate Selection in Neocortex. *Neuron* **85**, 275–288  
811 (2015).
- 812 43. Zhang, B. *et al.* The lncRNA Malat1 Is Dispensable for Mouse Development but Its  
813 Transcription Plays a cis -Regulatory Role in the Adult. *Cell Rep.* **2**, 111–123 (2012).
- 814 44. Ji, P. *et al.* MALAT-1, a novel noncoding RNA, and thymosin  $\beta$ 4 predict metastasis and



- 815 survival in early-stage non-small cell lung cancer. *Oncogene* **22**, 8031–8041 (2003).
- 816 45. Eißmann, M. *et al.* Loss of the abundant nuclear non-coding RNA MALAT1 is compatible  
817 with life and development. *RNA Biol.* **9**, 1076–1087 (2012).
- 818 46. Schwenk, F., Baron, U. & Rajewsky, K. A cre-transgenic mouse strain for the ubiquitous  
819 deletion of loxP-flanked gene segments including deletion in germ cells. *Nucleic Acids*  
820 *Res.* **23**, 5080–5081 (1995).
- 821 47. Bergmann, J. H. *et al.* Regulation of the ESC transcriptome by nuclear long noncoding  
822 RNAs. *Genome Res.* **9**, 1336–1346 (2015).
- 823 48. Luo, M. *et al.* Long non-coding RNAs control hematopoietic stem cell function. *Cell Stem*  
824 *Cell* **16**, 426–438 (2015).
- 825 49. Cabezas-Wallscheid, N. *et al.* Identification of regulatory networks in HSCs and their  
826 immediate progeny via integrated proteome, transcriptome, and DNA methylome  
827 analysis. *Cell Stem Cell* **15**, 507–522 (2014).
- 828 50. Fink, M. P. & Heard, S. O. Models of Sepsis and Septic Shock. *J. Surg. Res.* **49**, 186–196  
829 (1990).
- 830 51. Hirschfeld, M., Ma, Y., Weis, J. H., Vogel, S. N. & Weis, J. J. Cutting Edge: Repurification  
831 of Lipopolysaccharide Eliminates Signaling Through Both Human and Murine Toll-Like  
832 Receptor 2. *J. Immunol.* **165**, 618–622 (2014).
- 833 52. Kellogg, R. A., Tian, C., Etzrodt, M. & Tay, S. Cellular Decision Making by Non-  
834 Integrative Processing of TLR Inputs. *Cell Rep.* **19**, 125–135 (2017).
- 835 53. Cauwels, A. *et al.* Nitric oxide production by endotoxin preparations in TLR4-deficient  
836 mice. *Nitric Oxide - Biol. Chem.* **36**, 36–43 (2014).
- 837 54. Tracey, K. J. *et al.* Anti-cachectin/TNF monoclonal antibodies prevent septic shock during  
838 lethal bacteraemia. *Nature* **330**, 662–664 (1987).
- 839 55. Beutler, B., Milsark, I. W. & Cerami, A. C. Passive Immunization against Cachectin /  
840 Tumor Necrosis Factor Protects Mice from Lethal Effect of Endotoxin. *Science (80-. )*.  
841 **229**, 869–871 (1985).
- 842 56. Marino, M. W. *et al.* Characterization of tumor necrosis factor-deficient mice. *PNAS* **94**,  
843 8093–8 (1997).
- 844 57. Andergassen, D. *et al.* In vivo Firre and Dxz4 deletion elucidates roles for autosomal  
845 gene regulation. *bioRxiv* (2019). doi:10.1101/612440
- 846 58. Rinn, J. L. & Guttman, M. RNA and dynamic nuclear organization. *Science (80-. )*. **345**,  
847 1240–1241 (2014).
- 848 59. Kopp, F. & Mendell, J. T. Review Functional Classification and Experimental Dissection  
849 of Long Noncoding RNAs. *Cell* **172**, 393–407 (2018).
- 850 60. Santoro, F. *et al.* Imprinted Igf2r silencing depends on continuous Airn lncRNA  
851 expression and is not restricted to a developmental window. *Development* **140**, 1184–95  
852 (2013).
- 853 61. Wang, K. C. *et al.* A long noncoding RNA maintains active chromatin to coordinate  
854 homeotic gene expression. *Nature* **472**, 120–4 (2011).
- 855 62. Engreitz, J. M. *et al.* Local regulation of gene expression by lncRNA promoters,  
856 transcription and splicing. *Nature* **539**, 452–455 (2016).
- 857 63. Guttman, M. *et al.* Chromatin signature reveals over a thousand highly conserved large  
858 non-coding RNAs in mammals. *Nature* **457**, 223–227 (2009).
- 859 64. Nicolet, B. P. *et al.* Circular RNA expression in human hematopoietic cells is widespread  
860 and cell-type specific. *Nucleic Acids Res.* **46**, 8168–8180 (2018).
- 861 65. Perry, R. B.-T. & Ulitsky, I. The functions of long noncoding RNAs in development and  
862 stem cells. *Development* **143**, 3882–3894 (2016).
- 863 66. Love, M. I., Huber, W. & Anders, S. Moderated estimation of fold change and dispersion  
864 for RNA-seq data with DESeq2. *Genome Biol.* **15**, 1–21 (2014).
- 865 67. Liao, Y., Smyth, G. K. & Shi, W. FeatureCounts: An efficient general purpose program for

- 866 assigning sequence reads to genomic features. *Bioinformatics* **30**, 923–930 (2014).  
867 68. Strimmer, K. fdrtool: A versatile R package for estimating local and tail area-based false  
868 discovery rates. *Bioinformatics* **24**, 1461–1462 (2008).  
869 69. Sunwoo, H., Colognori, D., Froberg, J. E., Jeon, Y. & Lee, J. T. Repeat E anchors Xist  
870 RNA to the inactive X chromosomal compartment through CDKN1A-interacting protein  
871 (CIZ1). *PNAS* **114**, 10654–10659 (2017).  
872  
873  
874

## 875 FIGURE LEGENDS

876 **Figure 1. Mouse models to interrogate the *in vivo* function of *Firre*.** (A) Whole-mount *in situ*  
877 hybridization for *Firre* RNA in WT mouse embryos at E8.0 ( $n=4$ ), E9.5 ( $n=4$ ), E10.5 ( $n=5$ ), E11.5  
878 ( $n=6$ ), and E12.5 ( $n=4$ ) and  $\Delta$ *Firre* E11.5 embryos ( $n=3$ ). Scale bar is equal to 1 mm. (B)  
879 Abundance for protein coding transcripts (light gray) and noncoding transcripts (dark gray) in WT  
880 E11.5 heart tissue (representative tissue shown from 7 additional tissues). Vertical lines indicate  
881 *Firre* (red) and *Malat1* (blue). (C) Expression of *Firre* in E11.5 WT male ( $n=3$ ) and female ( $n=3$ )  
882 tissues shown as fragments per kilobase of transcript per million mapped reads (FPKM) from  
883 RNA-seq. Data shown as mean  $\pm$  standard error of the mean (SEM). Tissue abbreviations:  
884 forebrain (FB), midbrain (MB), pre-somitic mesoderm (PSM), lung (LU), forelimb (FL), hindlimb  
885 (HL), liver (LIV), and heart (HRT). (D) *Firre* knockout mouse (red). Schematic of mouse X  
886 chromosome ideogram showing the *Firre* locus relative to *Xist*. UCSC genome browser diagram  
887 of the *Firre* locus (shown in opposite orientation). Dashed lines indicate the genomic region that  
888 is deleted in  $\Delta$ *Firre* mice; single loxP scar upon deletion (gray triangle). Histone modifications and  
889 transcription factor binding sites in mouse embryonic stem cells (mESC-Bruce4, ENCODE/LICR,  
890 mm9). RNA-seq tracks for the *Firre* locus in WT and  $\Delta$ *Firre* E11.5 forelimbs. (E) Schematic of  
891 doxycycline(dox)-inducible *Firre* overexpression mouse (*Firre*<sup>OE</sup>, blue). Tet-responsive element  
892 (TRE), minimal CMV promoter (mCMV), reverse-tetracycline transcriptional activator (rtTA), beta-  
893 globin polyA terminator (pA). (F) *in situ* hybridization for *Firre* at E11.5 in control (WT or tg(*Firre*)  
894 +dox) ( $n=4$ ) and *Firre*<sup>OE</sup> +dox ( $n=3$ ) embryos. (G) qRT-PCR for *Firre* expression shown as fold-  
895 change (FC) in dox-treated E11.5 control and *Firre*<sup>OE</sup> hrt, fb, and fl. Expression normalized to  
896 beta-actin in the control sample and data plotted as mean  $\pm$  confidence interval (CI) at 98%. (H)  
897 RNA-FISH for *Firre* in male WT,  $\Delta$ *Firre*, and *Firre*<sup>rescue</sup> MEFs. DAPI (blue) marks the nucleus and  
898 *Firre* RNA is shown in green. (I) qRT-PCR for *Firre* expression shown as FC in male WT,  $\Delta$ *Firre*,  
899 *Firre*<sup>rescue</sup> +dox, and *Firre*<sup>rescue</sup> no dox MEFs. Expression normalized to beta-actin in the WT  
900 sample and data plotted as mean  $\pm$  CI at 98%.  
901



902 **Figure 2. Modulation of *Firre* impacts genes with roles in the blood. (A)** Schematized E11.5  
903 tissues used for RNA-seq. WT ( $n=6$ ) shown in black and  $\Delta$ *Firre* ( $n=6$ ) shown in red. Number of  
904 differentially expressed genes shown below each tissue. **(B)** Heatmap of replicate embryonic  
905 tissues. **(C)** GO analysis for genes found dysregulated in four or more tissues. **(D)** *Firre* expression  
906 across multiple mouse blood cell lineages (RNA-seq data from bloodspot.eu, GSE60101). **(E)**  
907 Experimental approach for cytokine and survival experiments. **(F)** Cytokine measurements in  
908 serum at 5 hours post intraperitoneal (i.p.) injection of 5 mg/kg LPS (broad-acting) in WT ( $n=5$ ),  
909  $\Delta$ *Firre* ( $n=5$ ), *Firre*<sup>OE</sup> control diet ( $n=3$ ), and *Firre*<sup>OE</sup> dox diet ( $n=2$  to 3). Data are shown as mean  
910  $\pm$  SEM and significance determined by an unpaired two-tail t-test. **(G)** Cytokine measurements in  
911 serum at 5 hours post i.p. injection of 5mg/kg LPS (specific-acting) in WT ( $n=6$ ), *Firre*<sup>OE</sup> control  
912 diet ( $n=5$ ), *Firre*<sup>OE</sup> dox diet ( $n=4$ ). Data are shown as mean  $\pm$  SEM and significance determined  
913 by an unpaired two-tail t-test. **(H)** 6-day survival plot of mice injected with 5 mg/kg LPS (specific-  
914 acting) or saline over two independent experiments in WT ( $n=30$ ),  $\Delta$ *Firre* ( $n=18$ ), *Firre*<sup>OE</sup> control  
915 diet ( $n=13$ ), and *Firre*<sup>OE</sup> dox diet ( $n=17$ ). Saline control group ( $n=10$ ) consisting of WT,  $\Delta$ *Firre*, and  
916 *Firre*<sup>OE</sup> mice. Significance determined by Mantel-Cox test.

917  
918 **Figure 3.  $\Delta$ *Firre* and *Firre*<sup>OE</sup> mice have cell-specific defects during hematopoiesis. (A)**  
919 Schematic of hematopoiesis. **(B)** Frequencies of CD4, CD8, and NK cells from the peripheral  
920 blood from WT (black circle) and  $\Delta$ *Firre* (red square) mice. Three representative experiments  
921 combined (seven independent experiments). Frequencies of common myeloid progenitors (CMP)  
922 and common lymphoid progenitors (CLP) in the bone marrow shown from WT and  $\Delta$ *Firre* mice.  
923 Two representative experiments combined (three independent experiments). **(C)** Frequencies of  
924 CMPs and CLPs from the bone marrow from control (tg(*Firre*) or WT or rtTA with dox) (black  
925 circle) and dox-treated *Firre*<sup>OE</sup> (blue square) mice. One representative experiment shown (two  
926 independent experiments). Frequencies of CD4, CD8, and NK cells from the peripheral blood  
927 from control (WT or tg(*Firre*) or rtTA with dox) (black circle) and dox-treated *Firre*<sup>OE</sup> (blue square)  
928 mice. One representative experiment shown (three independent experiments). All cell frequencies  
929 determined by flow cytometry analysis. All data are plotted as percent (%) of live cells showing  
930 the mean  $\pm$  SEM and statistical significance determined by a two-tailed Mann-Whitney U test.

931  
932 **Figure 4. Ectopic expression of *Firre* rescues physiological and molecular defects in CLPs**  
933 ***in vivo*.** **(A)** Schematic of experimental approach. **(B)** Bar graph indicating the frequency of CLPs  
934 shown as percent of live in total bone marrow from 3-7 month old WT ( $n=16$ , mean age=26  
935 weeks),  $\Delta$ *Firre* ( $n=17$ , mean age=23 weeks), and *Firre*<sup>rescue</sup> dox diet ( $n=15$ , mean age=23 weeks)

936 mice over three independent experiments. Data are shown as mean  $\pm$  SEM and statistical  
937 significance determined by a two-tailed Mann-Whitney U test. **(C)** *Firre* RNA expression in CLPs  
938 from WT ( $n=4$ ),  $\Delta$ *Firre* ( $n=4$ ), and dox-treated *Firre*<sup>rescue</sup> ( $n=4$ ) determined by RNA-seq. Data  
939 plotted as transcripts per million (TPM +1) showing the mean  $\pm$  SEM. **(D)** Heatmap showing  
940 significantly differentially expressed genes in CLPs in  $\Delta$ *Firre* / WT comparison and dox-treated  
941 *Firre*<sup>rescue</sup> /  $\Delta$ *Firre* and comparison. **(E)** GO analysis for significantly dysregulated genes in  $\Delta$ *Firre*  
942 CLPs. **(F)** Examples of genes that show significant reciprocal regulation in WT,  $\Delta$ *Firre*, and dox-  
943 treated *Firre*<sup>rescue</sup> CLPs. **(G)** *Firre* locus region (2 Mb) showing gene expression differences in log2  
944 FC between  $\Delta$ *Firre* and WT CLPs, mouse embryonic forelimb, and heart. *Firre* is shown in red,  
945 significantly dysregulated genes are shown in red, genes that are not significantly changed are  
946 shown in black, and genes that were not detected shown in white.

947

948

## 949 EXTENDED DATA FIGURES

### 950 Extended Data Figure 1: Schematization of the targeted *Firre* locus and genotyping. **(A)**

951 Targeted *Firre* locus as described in<sup>23</sup> shown in reverse orientation. Targeting cassettes  
952 containing hygromycin and neomycin cassettes shown as light gray rectangles and the loxP sites  
953 shown as dark gray triangles. Cre-mediated recombined allele shown below as a red line with a  
954 single loxP site. Arrows indicate genotyping primers used to amplify alleles for: *Firre* WT, black;  
955 knockout allele (KO), red; *hygromycin* (*hyg*), light gray; and *neomycin* (*neo*), blue. **(B)** Genotyping  
956 gel for: *Firre*<sup>floxed</sup> (fl/fl); *Firre* heterozygous (+/-); and *Firre* knockout (-/-) mice. Primers used to  
957 amplify different alleles indicated below the gel. **(C)** DNA sequence used to generate a *Firre*  
958 riboprobe.

959

### 960 Extended Data Figure 2. Weight measurements and skeletal analysis of $\Delta$ *Firre* mice. **(A)**

961 Body weight measurements in male WT ( $n=38$ ) and  $\Delta$ *Firre* ( $n=35$ ) and **(B)** female WT ( $n=21$ ) and  
962  $\Delta$ *Firre* ( $n=29$ ) mice over 12 weeks are not significantly different. Data shown as a box and whisker  
963 plot with the minimum and maximum, the significance was determined using a two-tailed t-test,  
964 WT shown in dark gray and  $\Delta$ *Firre* shown in red. **(C-G)** Skeletal preparations of E18.5 WT ( $n=8$ )  
965 and  $\Delta$ *Firre* ( $n=7$ ) mice stained with alcian blue and alizarin red show that  $\Delta$ *Firre* mice have normal  
966 skeletal development **(D)** Rib cages from E18.5 wild-type ( $n=8$ )  $\Delta$ *Firre* ( $n=7$ ) showing that  $\Delta$ *Firre*  
967 embryos have a normal number of ribs. **(E)** Skulls from E18.5 WT ( $n=8$ ) and  $\Delta$ *Firre* ( $n=7$ ) embryos  
968 show normal morphology. Abbreviations used: n, nasal; f, frontal bone; p, parietal; ip, interparietal;  
969 s, supraoccipital; e, exoccipital; md, mandible; and x, maxillary. **(F)** Limb patterning and

970 ossification appears normal in WT ( $n=8$ ) and  $\Delta Firre$  mice ( $n=7$ ). Abbreviations used: sc, scapula;  
971 cl, clavicle; hu, humerus; ra, radius; and ul, ulna. **(G)** Vertebrae patterning and ossification  
972 appears normal in WT ( $n=8$ ) and  $\Delta Firre$  ( $n=7$ ) embryos. **(H)** The total number of vertebrae in E18.5  
973 WT ( $n=4$ ) and  $\Delta Firre$  ( $n=5$ ) embryos do not significantly differ (two-tailed unpaired t-test,  $P=0.876$ ).  
974 Error bars indicate the SEM. **(I)** The number of vertebrae per: c, cervical; t, thoracic; l, lumbar,  
975 and s, sacral segments in E18.5  $\Delta Firre$  ( $n=5$ ) embryos is the same as found in WT ( $n=4$ )

976

977 **Extended Data Figure 3. Deletion of *Firre* does not impact X chromosome inactivation or**  
978 **change expression of *Xist* RNA. (A)** *Xist* RNA expression (FPKM) in eight female tissues from  
979 RNA-seq in WT ( $n=3$ ) and  $\Delta Firre$  ( $n=3$ ) at E11.5. Data are shown as mean  $\pm$  SEM. **(B,C)** Co-  
980 DNA/RNA FISH in female *Firre*<sup>+/-</sup> MEFs. DNA FISH for the WT *Firre* locus shown in red and *Xist*  
981 RNA shown in green. Quantification of localization of *Xist* RNA with the WT *Firre* locus from  
982 independent *Firre*<sup>+/-</sup> MEFs. Cis indicates a co-localization between the WT *Firre* DNA locus and  
983 *Xist* RNA and trans indicates *Xist* RNA did not co-localize with the WT *Firre* DNA locus.

984

985 **Extended Data Figure 4. *Firre*<sup>OE</sup> mice unchallenged do not have increased levels in serum**  
986 **cytokines. (A)** Experimental schematic for cytokine measurements in 5-7 weeks old mice injected  
987 with either saline or LPS. **(B)** Cytokine measurements in serum at 5 hours post saline or LPS  
988 injection from control saline injected mice (WT or tg(*Firre*) fed a dox diet,  $n=3$ , black diamonds),  
989 *Firre*<sup>OE</sup> saline injected mice fed a dox diet ( $n=3$ , blue triangles), and WT mice fed a normal diet  
990 injected with 5 mg/kg LPS (specific-activity) ( $n=3$  to 4, gray circles). Data are shown as mean  $\pm$   
991 SEM and statistical significance determined using a two-tailed unpaired t-test.

992

993 **Extended Data Figure 5. Immunophenotyping in WT,  $\Delta Firre$ , and *Firre*<sup>OE</sup> mice. (A)** Frequency  
994 of B cells in the peripheral blood shown as percent (%) of live cells from WT and  $\Delta Firre$  mice.  
995 Three representative experiments combined (seven independent experiments). **(B)** Frequencies  
996 of double negative (DN) (DN1, DN2, DN3, DN4), double positive (DP), single positive (SP) CD4,  
997 and SP CD8 cells in thymuses shown as percent of live cells from WT and  $\Delta Firre$  mice.  
998 Enumeration of cells shown below as cells / uL of thymus. A representative experiment shown  
999 (three independent experiments). **(C)** Frequencies of HSC and MPP cell populations from total  
1000 bone marrow (BM) shown as percent of live cells from WT and  $\Delta Firre$  mice. Enumeration of cells  
1001 shown below as cells / uL of bone marrow. Two representative experiments combined (three  
1002 independent experiments). **(D)** Frequency of B cells in the peripheral blood shown as percent of  
1003 live cells from control (tg(*Firre*), WT, or rtTA with dox) and dox-treated *Firre*<sup>OE</sup> mice. One

1004 representative experiment shown (three independent experiments). **(E)** Frequencies of HSC and  
1005 MPP cells from total BM shown as percent of live cells from control (tg(*Firre*), WT, or rtTA with  
1006 dox) and dox-treated *Firre*<sup>OE</sup> mice (two independent experiments). All data shown as mean ± SEM  
1007 and statistical significance determined using a two-tailed Mann-Whitney-U test.

1008  
1009 **Extended Data Figure 6.  $\Delta$ *Firre* HSC populations are less competitive at repopulating the**  
1010 **blood *in vivo*.** **(A)** Schematic of competitive chimera HSC transplant experiment. HSC enriched  
1011 population from age- and sex-matched *Firre* WT/CD45.2 (blue) or  $\Delta$ *Firre*/CD45.2 (red) combined  
1012 with PepBoy/CD45.1 (gray) at a 1:1 ratio and transplanted into lethally irradiated PepBoy/CD45.1  
1013 recipient male mice. **(B)** Representative flow cytometry plots from WT showing the FACS strategy  
1014 used for isolating an HSC-enriched population for transplant from lineage depleted total bone  
1015 marrow. **(C)** Frequencies of donor-derived CD45.2 CD4, CD8, NK, and B cells at 23 weeks post  
1016 competitive chimera transplant for *Firre* WT/CD45.2 with PepBoy/CD45.1 ( $n=10$ ), and  
1017  $\Delta$ *Firre*/CD45.2 with PepBoy/CD45.1 ( $n=10$ ) (two independent experiments shown). Data are  
1018 shown as mean ± SEM and significance determined by a two-tailed Mann-Whitney U test.

1019  
1020 **Extended Data Figure 7. *Firre*<sup>rescue</sup> mice overexpressing *Firre* RNA have a decrease in the**  
1021 **frequency of NK cells in the peripheral blood.** **(A)** Representative flow cytometry plots of NK  
1022 cells in WT and dox-treated *Firre*<sup>rescue</sup> mice. **(B)** Frequency of NK cells shown as percent live cells  
1023 in the peripheral blood from female mice 24 to 33 weeks old: dox-treated WT ( $n=5$ ), dox-treated  
1024  $\Delta$ *Firre* ( $n=5$ ), no dox *Firre*<sup>rescue</sup> ( $n=4$ ), and dox-treated *Firre*<sup>rescue</sup> ( $n=5$ ). Data are shown as mean ±  
1025 SEM, two independent experiments, and significance determined by using a two-tailed unpaired  
1026 t-test.

1027  
1028 **Extended Data Figure 8. Overexpression of *Firre* RNA in *Firre*<sup>rescue</sup> mice restores CLP**  
1029 **frequency in lineage-depleted bone marrow.** **(A)** Representative gating strategy for identifying  
1030 CLPs in total and lineage depleted bone marrow (BM) from WT,  $\Delta$ *Firre*, and dox-treated *Firre*<sup>rescue</sup>  
1031 mice. **(B)** Frequency of CLPs shown as percent of live cells in lineage depleted bone marrow over  
1032 three experiments from male (7 to 10 weeks old, solid object) and female (19 to 24 weeks old,  
1033 outlined object) mice: WT ( $n=9$ );  $\Delta$ *Firre* ( $n=9$ ), and dox-treated *Firre*<sup>rescue</sup> ( $n=11$ ). Data are plotted  
1034 as the mean ± SEM and significance determined by a two-tailed Mann-Whitney U test.

1035  
1036 **Extended Data Figure 9. *Firre* does not regulate the expression of neighboring genes. (A-**  
1037 **F) *Firre* locus region (2 Mb) showing log<sub>2</sub> fold change (log<sub>2</sub> FC) gene expression differences**

1038 (RNA-seq) between  $\Delta$ *Firre* and WT E11.5 tissues (forebrain, pre-somitic mesoderm (PSM), lung,  
1039 hindlimb, liver, and midbrain). *Firre* is shown in red, significantly dysregulated genes are shown  
1040 in red, genes with less than 1 FPKM expression are shown in gray, and genes that are not  
1041 significantly changed are shown in black.

1042

1043

## 1044 **EXTENDED DATA TABLES**

1045 **Extended Data Table 1. Genotype and male and female distribution in  $\Delta$ *Firre* and *Firre***  
1046 **overexpressing mice.** Genotyping from progeny at P7 from intercrosses between male WT and  
1047 female WT; male  $\Delta$ *Firre* and female  $\Delta$ *Firre*; male rtTA and female *Firre*<sup>OE</sup> no dox; and male rtTA  
1048 and female *Firre*<sup>OE</sup> dox-diet mice. Litter size shown as mean with standard deviation (s.d.), not  
1049 determined (n.d.), Chi-square statistic reported (p-value).

1050

1051 **Extended Data Table 2. Differential gene expression in midbrain tissue from E11.5 wild-**  
1052 **type and  $\Delta$ *Firre* embryos.**

1053

1054 **Extended Data Table 3. Differential gene expression in forebrain tissue from E11.5 wild-**  
1055 **type and  $\Delta$ *Firre* embryos.**

1056

1057 **Extended Data Table 4. Differential gene expression in presomitic mesoderm tissue from**  
1058 **E11.5 wild-type and  $\Delta$ *Firre* embryos.**

1059

1060 **Extended Data Table 5. Differential gene expression in lung tissue from E11.5 wild-type**  
1061 **and  $\Delta$ *Firre* embryos.**

1062

1063 **Extended Data Table 6. Differential gene expression in hindlimb tissue from E11.5 wild-**  
1064 **type and  $\Delta$ *Firre* embryos.**

1065

1066 **Extended Data Table 7. Differential gene expression in forelimb tissue from E11.5 wild-type**  
1067 **and  $\Delta$ *Firre* embryos.**

1068

1069 **Extended Data Table 8. Differential gene expression in liver tissue from E11.5 wild-type**  
1070 **and  $\Delta$ *Firre* embryos.**

1071

1072 **Extended Data Table 9. Differential gene expression in heart tissue from E11.5 wild-type**  
1073 **and  $\Delta$ *Firre* embryos.**

1074

1075 **Extended Data Table 10. Differential gene expression in male CLPs from wild-type and**  
1076  **$\Delta$ *Firre*.**

1077

1078 **Extended Data Table 11. Differential gene expression in male CLPs from  $\Delta$ *Firre* and  $\Delta$ *Firre*;**  
1079 ***Firre*<sup>rescue</sup>.**

1080



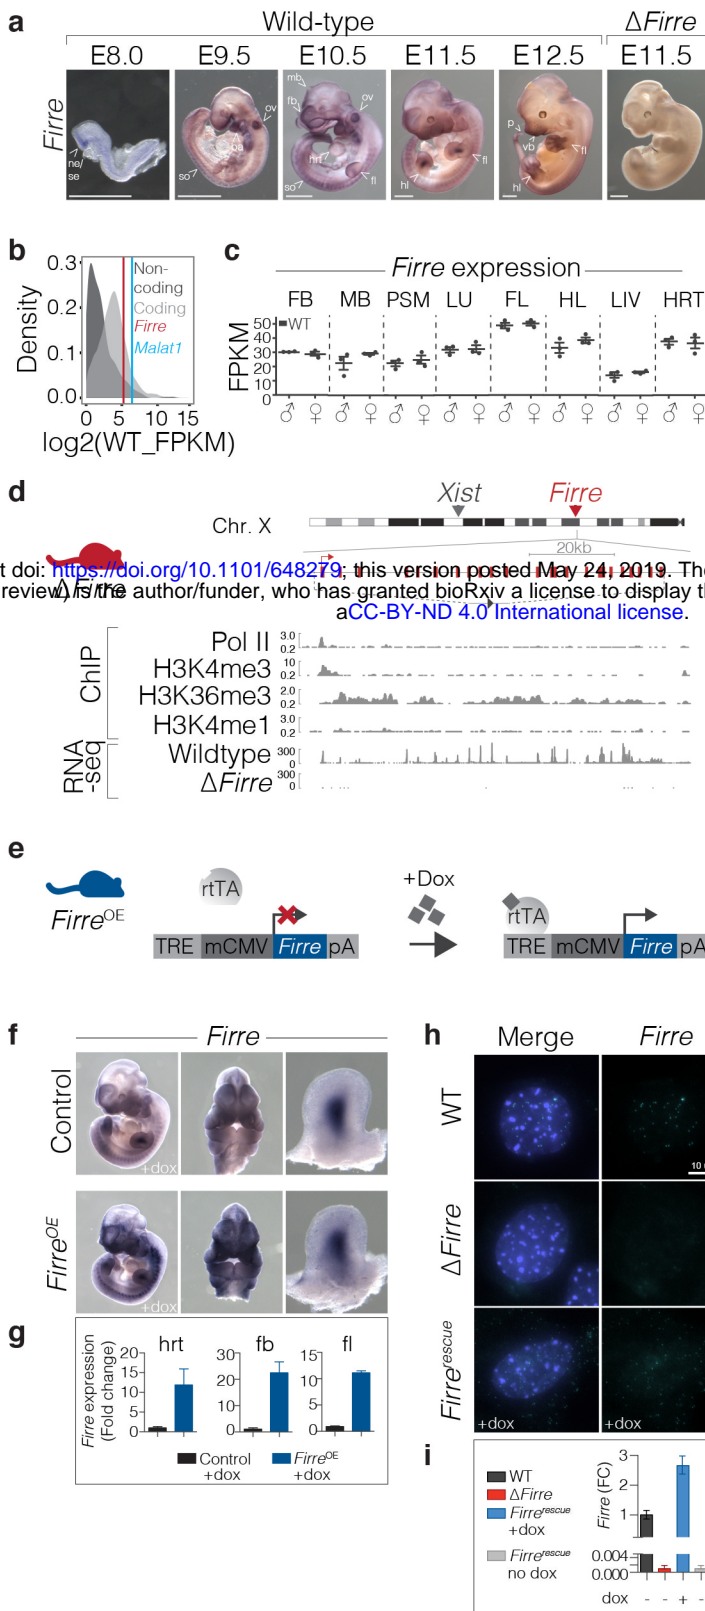

bioRxiv preprint doi: <https://doi.org/10.1101/648279>; this version posted May 24, 2019. The copyright holder for this preprint (which was certified by peer review) is the author/funder, who has granted bioRxiv a license to display the preprint in perpetuity. It is made available under aCC-BY-ND 4.0 International license.

**Figure 1. Mouse models to interrogate the in vivo function of Firre.** **(A)** Whole-mount in situ hybridization for Firre RNA in WT mouse embryos at E8.0 (n=4), E9.5 (n=4), E10.5 (n=5), E11.5 (n=6), and E12.5 (n=4) and  $\Delta$ Firre E11.5 embryos (n=3). Scale bar is equal to 1 mm. **(B)** Abundance for protein coding transcripts (light gray) and noncoding transcripts (dark gray) in WT E11.5 heart tissue (representative tissue shown from 7 additional tissues). Vertical lines indicate Firre (red) and Malat1 (blue). **(C)** Expression of Firre in E11.5 WT male (n=3) and female (n=3) tissues shown as fragments per kilobase of transcript per million mapped reads (FPKM) from RNA-seq. Data shown as mean  $\pm$  standard error of the mean (SEM). Tissue abbreviations: forebrain (FB), midbrain (MB), pre-somitic mesoderm (PSM), lung (LU), forelimb (FL), hindlimb (HL), liver (LIV), and heart (HRT). **(D)** Firre knockout mouse (red). Schematic of mouse X chromosome ideogram showing the Firre locus relative to Xist. UCSC genome browser diagram of the Firre locus (shown in opposite orientation). Dashed lines indicate the genomic region that is deleted in  $\Delta$ Firre mice; single loxP scar upon deletion (gray triangle). Histone modifications and transcription factor binding sites in mouse embryonic stem cells (mESC-Bruce4, ENCODE/LICR, mm9). RNA-seq tracks for the Firre locus in WT and  $\Delta$ Firre E11.5 forelimbs. **(E)** Schematic of doxycycline(dox)-inducible Firre overexpression mouse (Firre<sup>OE</sup>, blue). Tet-responsive element (TRE), minimal CMV promoter (mCMV), reverse-tetracycline transcriptional activator (rtTA), beta-globin polyA terminator (pA). **(F)** in situ hybridization for Firre at E11.5 in control (WT or tg(Firre) +dox) (n=4) and Firre<sup>OE</sup> +dox (n=3) embryos. **(G)** qRT-PCR for Firre expression shown as fold-change (FC) in dox-treated E11.5 control and Firre<sup>OE</sup> hrt, fb, and fl. Expression normalized to beta-actin in the control sample and data plotted as mean  $\pm$  confidence interval (CI) at 98%. **(H)** RNA-FISH for Firre in male WT,  $\Delta$ Firre, and Firre<sup>rescue</sup> MEFs. DAPI (blue) marks the nucleus and Firre RNA is shown in green. **(I)** qRT-PCR for Firre expression shown as FC in male WT,  $\Delta$ Firre, Firre<sup>rescue</sup> +dox, and Firre<sup>rescue</sup> no dox MEFs. Expression normalized to beta-actin in the WT sample and data plotted as mean  $\pm$  CI at 98%.



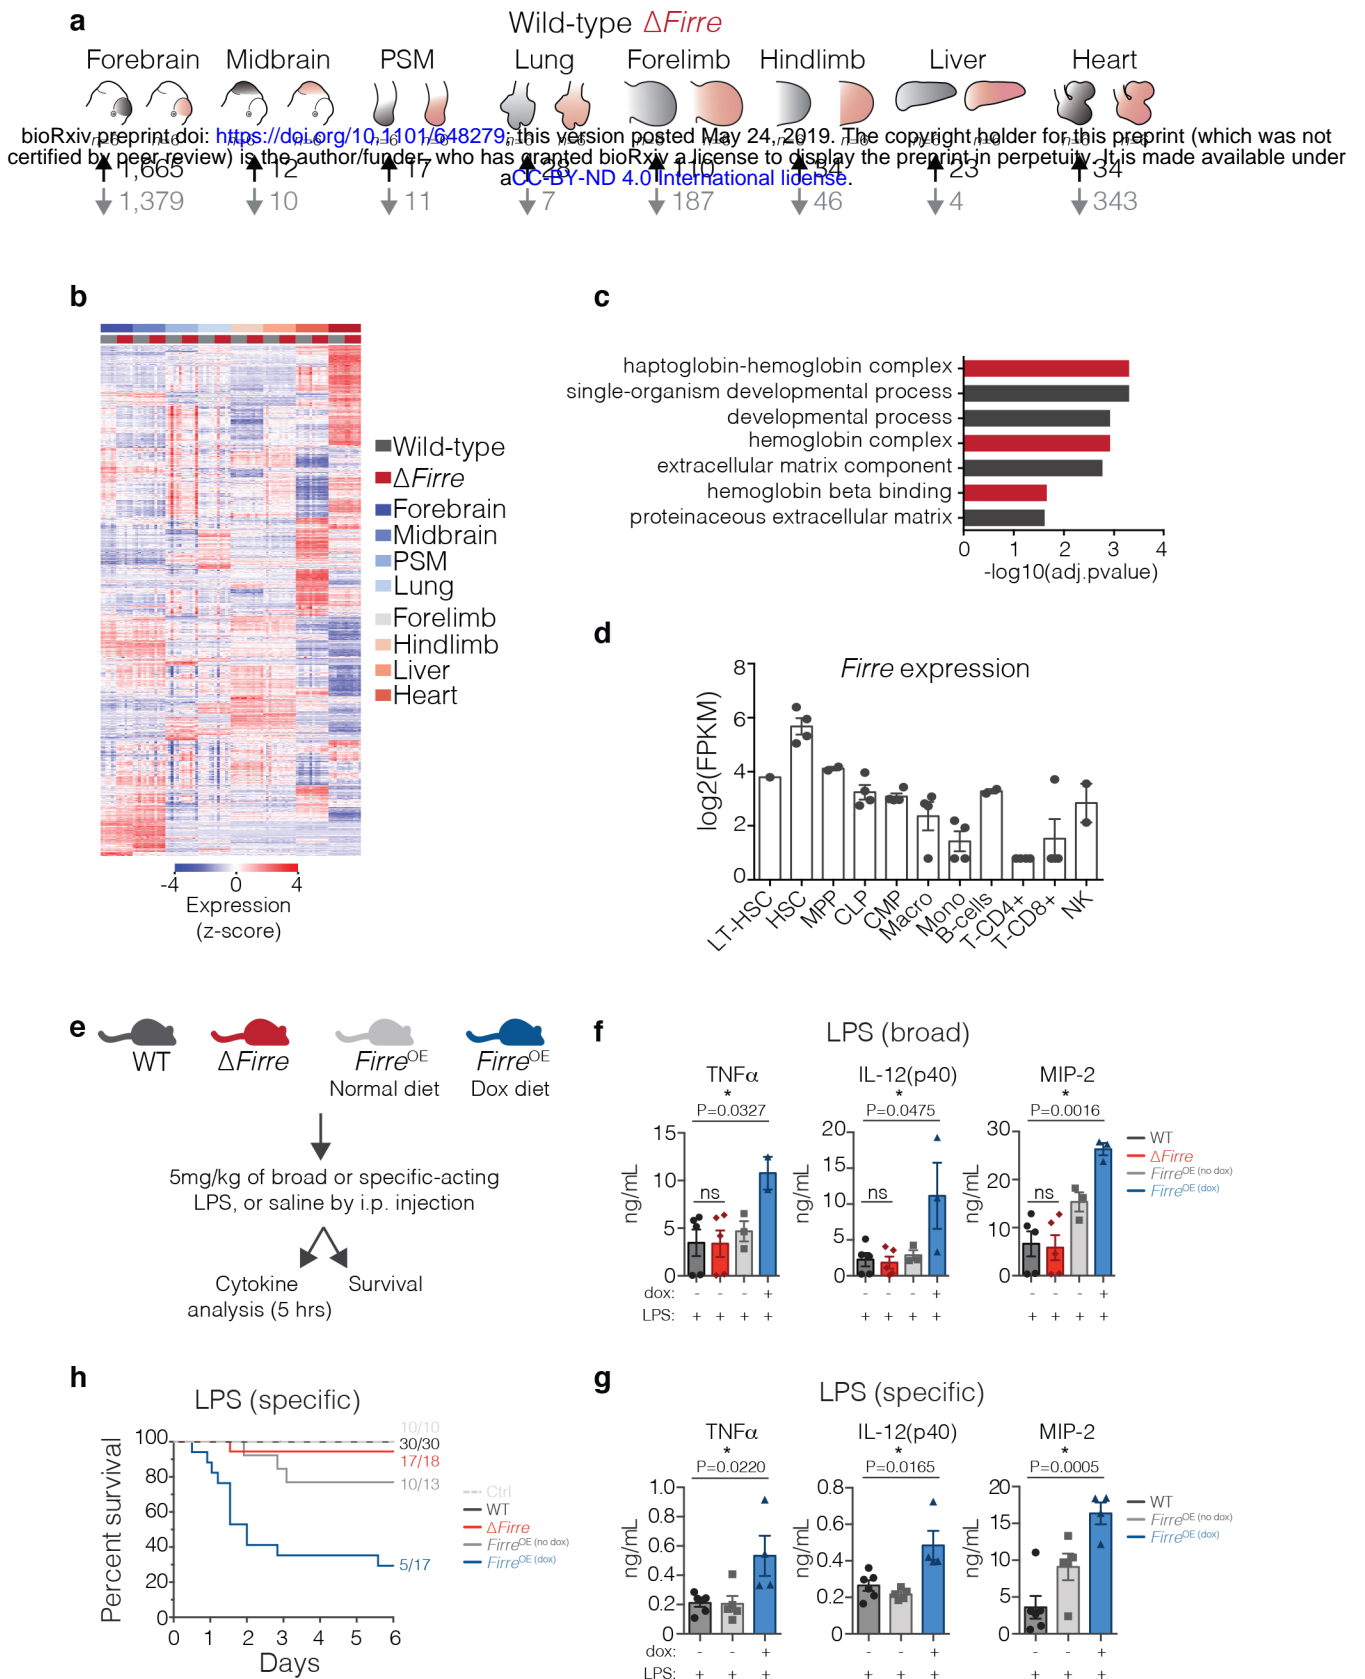

**Figure 2. Modulation of *Firre* impacts genes with roles in the blood. (A)** Schematized E11.5 tissues used for RNA-seq. WT (n=6) shown in black and  $\Delta Firre$  (n=6) shown in red. Number of differentially expressed genes shown below each tissue. **(B)** Heatmap of replicate embryonic tissues. **(C)** GO analysis for genes found dysregulated in four or more tissues. **(D)** *Firre* expression across multiple mouse blood cell lineages (RNA-seq data from bloodspot.eu, GSE60101). **(E)** Experimental approach for cytokine and survival experiments. **(F)** Cytokine measurements in serum at 5 hours post intraperitoneal (i.p.) injection of 5 mg/kg LPS (broad-acting) in WT (n=5),  $\Delta Firre$  (n=5), *Firre*<sup>OE</sup> control diet (n=3), and *Firre*<sup>OE</sup> dox diet (n=2 to 3). Data are shown as mean  $\pm$  SEM and significance determined by an unpaired two-tail t-test. **(G)** Cytokine measurements in serum at 5 hours post i.p. injection of 5mg/kg LPS (specific-acting) in WT (n=6), *Firre*<sup>OE</sup> control diet (n=5), *Firre*<sup>OE</sup> dox diet (n=4). Data are shown as mean  $\pm$  SEM and significance determined by an unpaired two-tail t-test. **(H)** 6-day survival plot of mice injected with 5 mg/kg LPS (specific-acting) or saline over two independent experiments in WT (n=30),  $\Delta Firre$  (n=18), *Firre*<sup>OE</sup> control diet (n=13), and *Firre*<sup>OE</sup> dox diet (n=17). Saline control group (n=10) consisting of WT,  $\Delta Firre$ , and *Firre*<sup>OE</sup> mice. Significance determined by Mantel-Cox test.

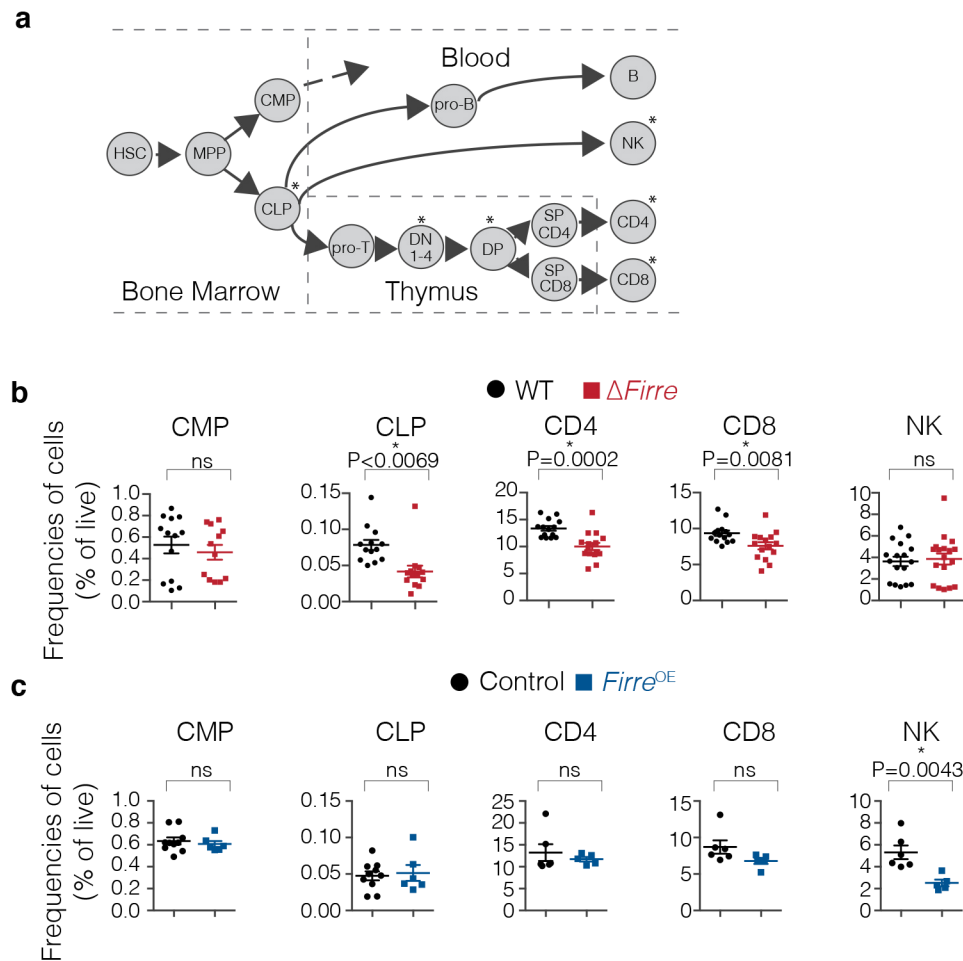

**Figure 3.  $\Delta$ *Firre* and *Firre*<sup>OE</sup> mice have cell-specific defects during hematopoiesis. (A)** Schematic of hematopoiesis. **(B)** Frequencies of CD4, CD8, and NK cells from the peripheral blood from WT (black circle) and  $\Delta$  *Firre* (red square) mice. Three representative experiments combined (seven independent experiments). Frequencies of common myeloid progenitors (CMP) and common lymphoid progenitors (CLP) in the bone marrow shown from WT and  $\Delta$ *Firre* mice. Two representative experiments combined (three independent experiments). **(C)** Frequencies of CMPs and CLPs from the bone marrow from control (tg(*Firre*) or WT or rtTA with dox) (black circle) and dox-treated *Firre*<sup>OE</sup> (blue square) mice. One representative experiment shown (two independent experiments). Frequencies of CD4, CD8, and NK cells from the peripheral blood from control (WT or tg(*Firre*) or rtTA with dox) (black circle) and dox-treated *Firre*<sup>OE</sup> (blue square) mice. One representative experiment shown (three independent experiments). All cell frequencies determined by flow cytometry analysis. All data are plotted as percent (%) of live cells showing the mean  $\pm$  SEM and statistical significance determined by a two-tailed Mann-Whitney U test.

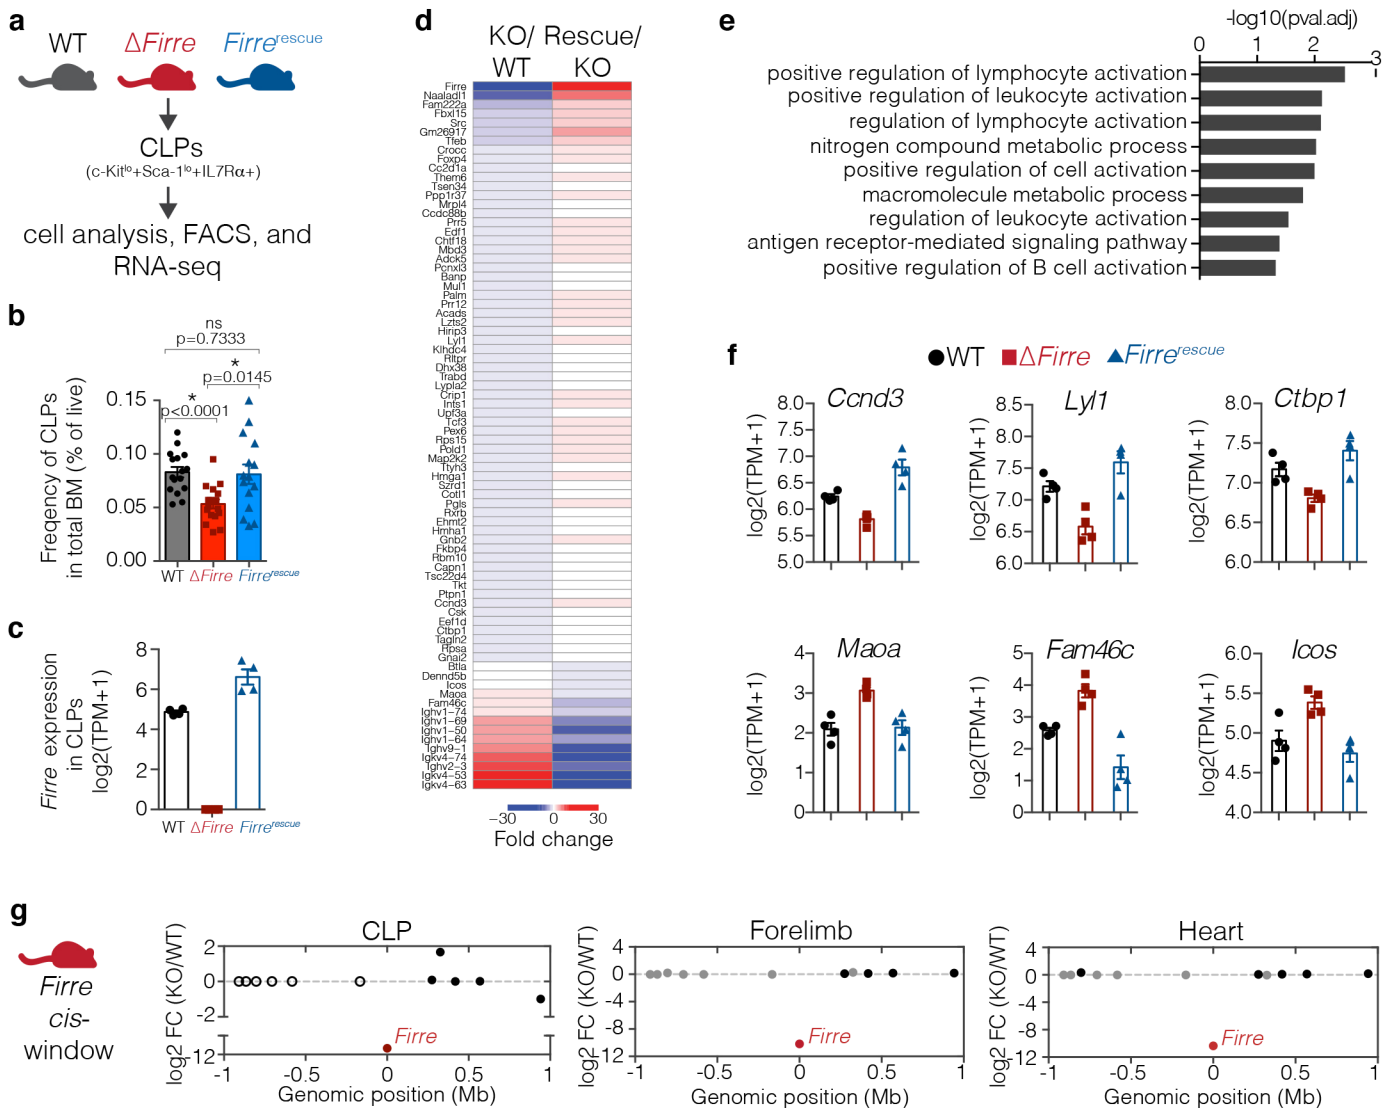

**Figure 4. Ectopic expression of *Firre* rescues physiological and molecular defects in CLPs in vivo. (A)** Schematic of experimental approach. **(B)** Bar graph indicating the frequency of CLPs shown as percent of live in total bone marrow from 3-7 month old WT (n=16, mean age=26 weeks),  $\Delta$ Firre (n=17, mean age=23 weeks), and *Firre*<sup>rescue</sup> dox diet (n=15, mean age=23 weeks) mice over three independent experiments. Data are shown as mean  $\pm$  SEM and statistical significance determined by a two-tailed Mann-Whitney U test. **(C)** *Firre* RNA expression in CLPs from WT (n=4),  $\Delta$ Firre (n=4), and dox-treated *Firre*<sup>rescue</sup> (n=4) determined by RNA-seq. Data plotted as transcripts per million (TPM +1) showing the mean  $\pm$  SEM. **(D)** Heatmap showing significantly differentially expressed genes in CLPs in  $\Delta$ Firre / WT comparison and dox-treated *Firre*<sup>rescue</sup> /  $\Delta$ Firre and comparison. **(E)** GO analysis for significantly dysregulated genes in  $\Delta$ Firre CLPs. **(F)** Examples of genes that show significant reciprocal regulation in WT,  $\Delta$ Firre, and dox-treated *Firre*<sup>rescue</sup> CLPs. **(G)** *Firre* locus region (2 Mb) showing gene expression differences in log<sub>2</sub> FC between  $\Delta$ Firre and WT CLPs, mouse embryonic forelimb, and heart. *Firre* is shown in red, significantly dysregulated genes are shown in red, genes that are not significantly changed are shown in black, and genes that were not detected shown in white.

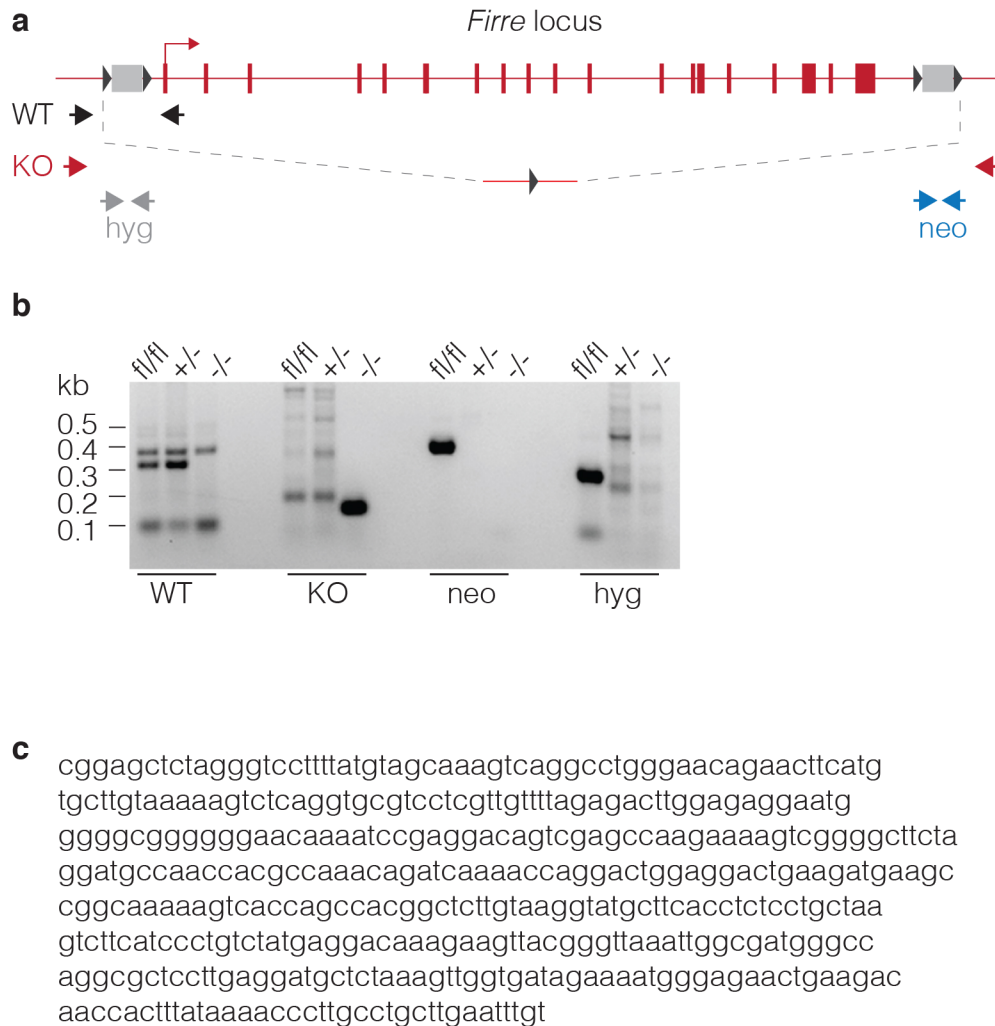

**Extended Data Figure 1: Schematization of the targeted *Firre* locus and genotyping. (A)** Targeted *Firre* locus as described in<sup>23</sup> shown in reverse orientation. Targeting cassettes containing hygromycin and neomycin cassettes shown as light gray rectangles and the loxP sites shown as dark gray triangles. Cre-mediated recombined allele shown below as a red line with a single loxP site. Arrows indicate genotyping primers used to amplify alleles for: *Firre* WT, black; knockout allele (KO), red; hygromycin (hyg), light gray; and neomycin (neo), blue. (B) Genotyping gel for: *Firrefloxed* (fl/fl); *Firre* heterozygous (+/-); and *Firre* knockout (-/-) mice. Primers used to amplify different alleles indicated below the gel. (C) DNA sequence used to generate a *Firre* riboprobe.



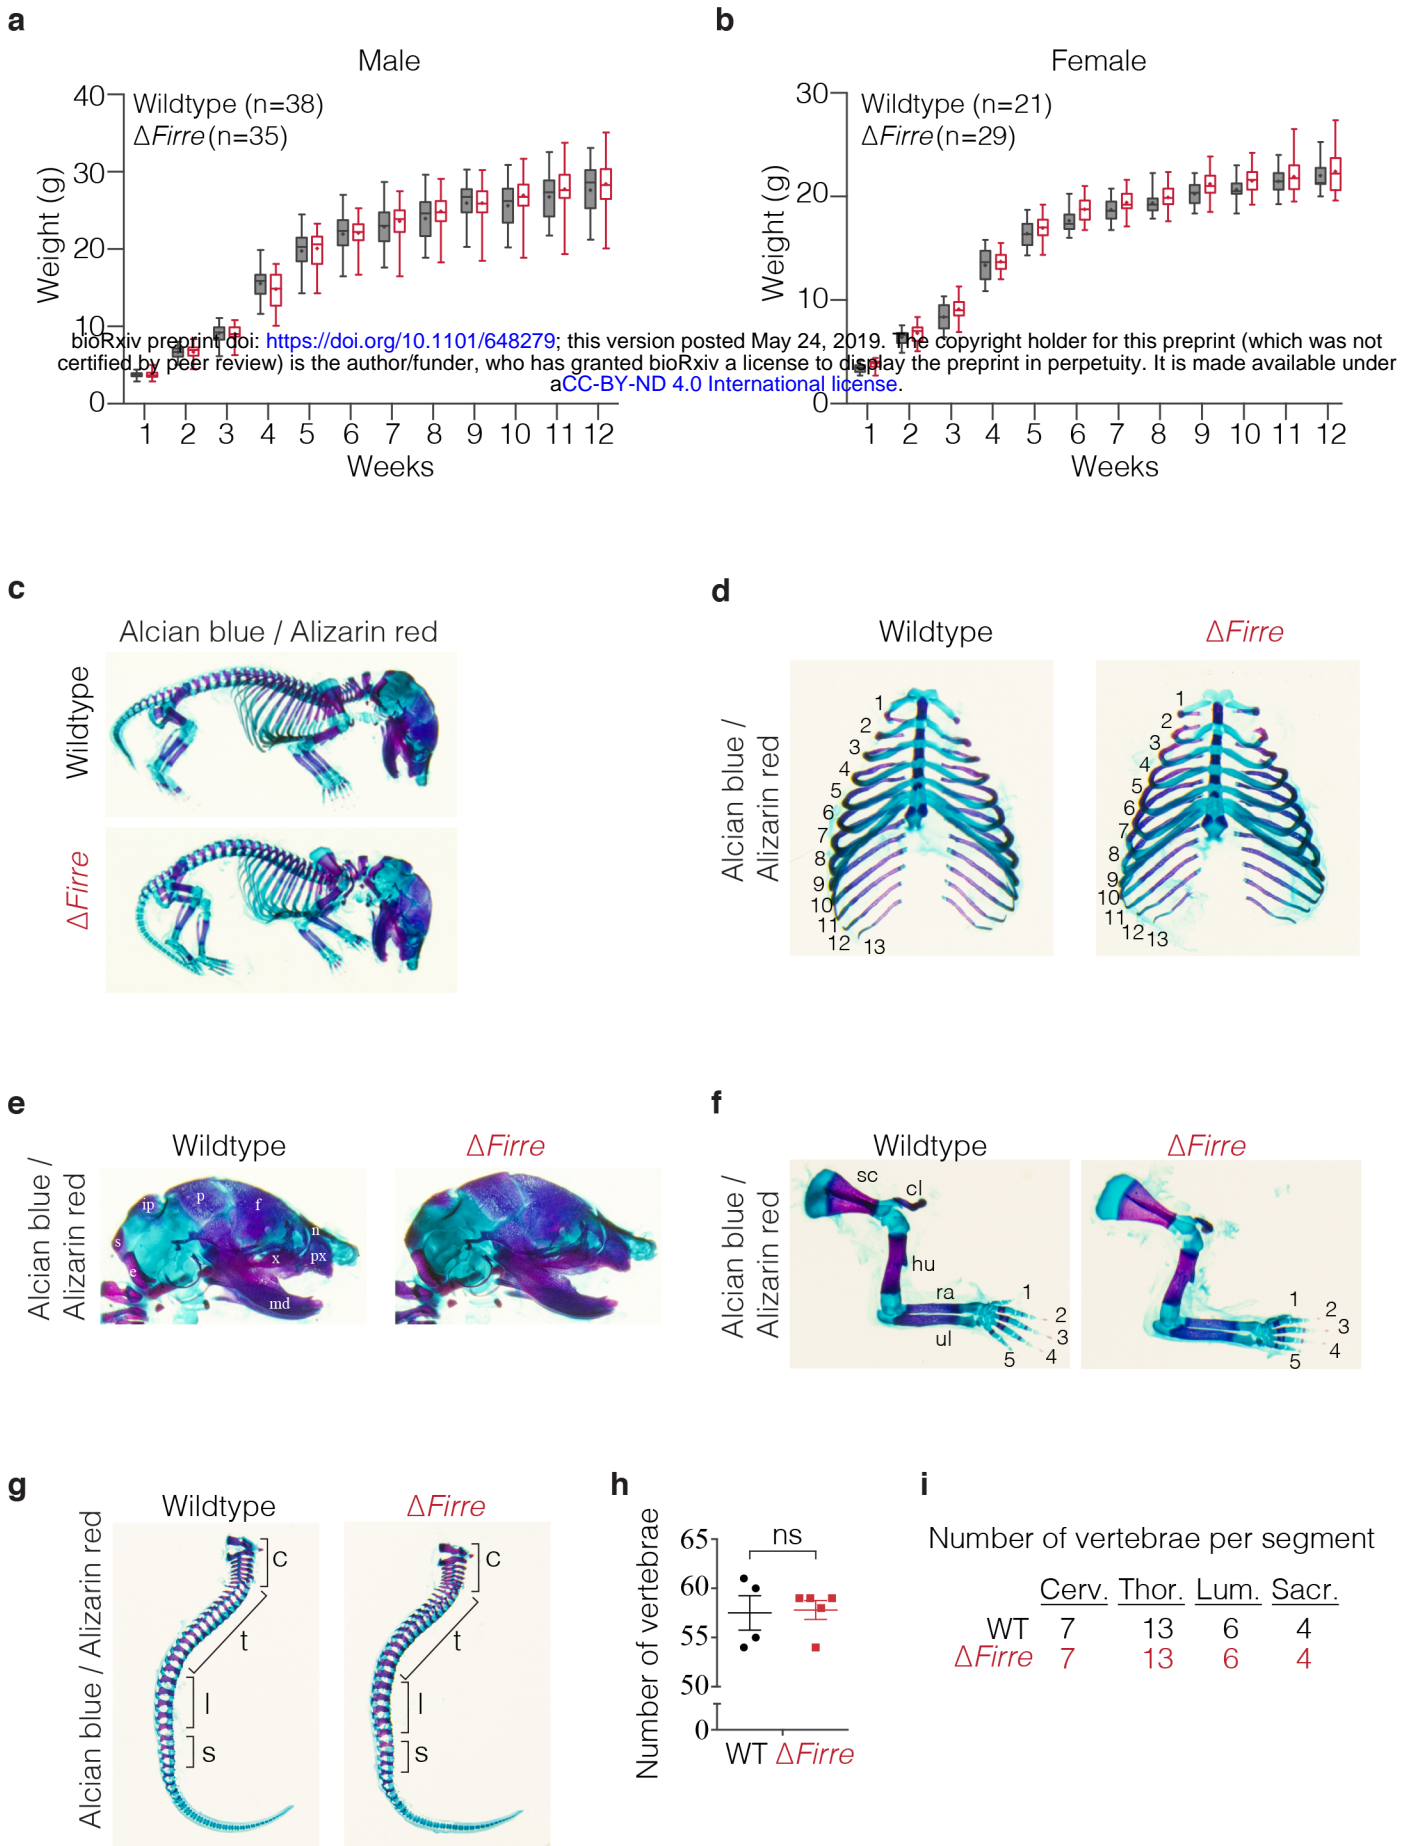

**Extended Data Figure 2. Weight measurements and skeletal analysis of  $\Delta$ Firre mice.** (A) Body weight measurements in male WT (n=38) and  $\Delta$ Firre (n=35) and (B) female WT (n=21) and  $\Delta$ Firre (n=29) mice over 12 weeks are not significantly different. Data shown as a box and whisker plot with the minimum and maximum, the significance was determined using a two-tailed t-test, WT shown in dark gray and  $\Delta$ Firre shown in red. (C-G) Skeletal preparations of E18.5 WT (n=8) and  $\Delta$ Firre (n=7) mice stained with alcian blue and alizarin red show that  $\Delta$ Firre mice have normal skeletal development (D) Rib cages from E18.5 WT (n=8)  $\Delta$ Firre (n=7) showing that  $\Delta$ Firre embryos have a normal number of ribs. (E) Skulls from E18.5 WT (n=8) and  $\Delta$ Firre (n=7) embryos show normal morphology. Abbreviations used: n, nasal; f, frontal bone; p, parietal; ip, interparietal; s, supraoccipital; e, exoccipital; md, mandible; and x, maxillary. (F) Limb patterning and ossification appears normal in WT (n=8) and  $\Delta$ Firre mice (n=7). Abbreviations used: sc, scapula; cl, clavicle; hu, humerus; ra, radius; and ul, ulna. (G) Vertebrae patterning and ossification appears normal in WT (n=8) and  $\Delta$ Firre (n=7) embryos. (H) The total number of vertebrae in E18.5 WT (n=4) and  $\Delta$ Firre (n=5) embryos do not significantly differ (unpaired t-test, P=0.876). Error bars show the s.e.m. (I) The number of vertebrae per: c, cervical; t, thoracic; l, lumbar, and s, sacral segments in E18.5  $\Delta$ Firre (n=5) embryos is the same as found in WT (n=4)



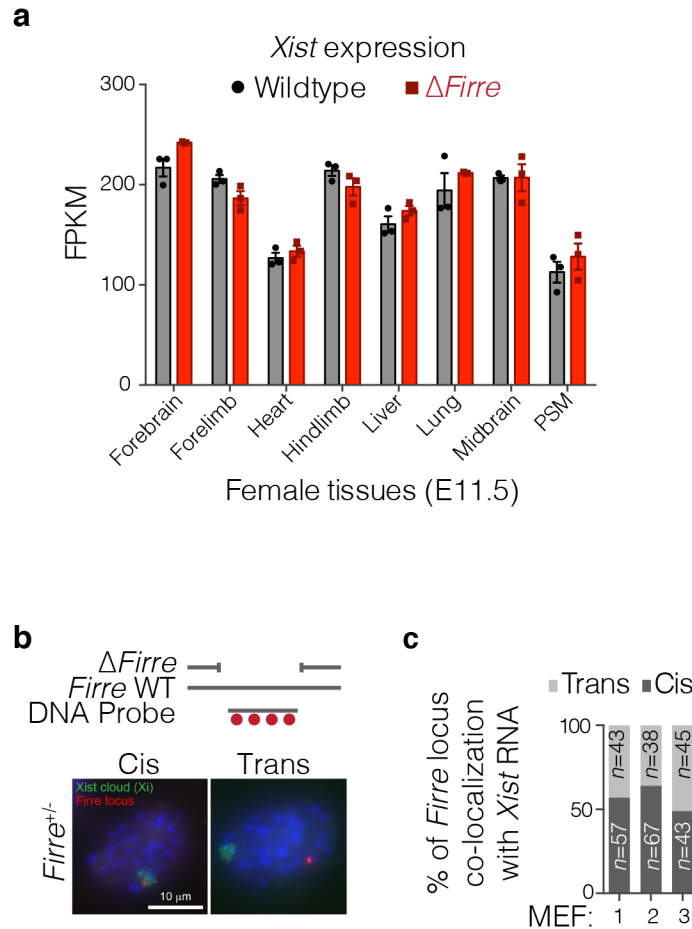

**Extended Data Figure 3. Deletion of *Firre* does not impact X chromosome inactivation or change expression of *Xist* RNA.** (A) *Xist* RNA expression (FPKM) in eight female tissues from RNA-seq in WT (n=3) and  $\Delta$ *Firre* (n=3) at E11.5. Data are shown as mean  $\pm$  SEM. (B,C) Co-DNA/RNA FISH in female *Firre*<sup>+/+</sup> MEFs. DNA FISH for the WT *Firre* locus shown in red and *Xist* RNA shown in green. Quantification of localization of *Xist* RNA with the WT *Firre* locus from independent *Firre*<sup>+/+</sup> MEFs. Cis indicates a co-localization between the WT *Firre* DNA locus and *Xist* RNA and trans indicates *Xist* RNA did not co-localize with the WT *Firre* DNA locus.

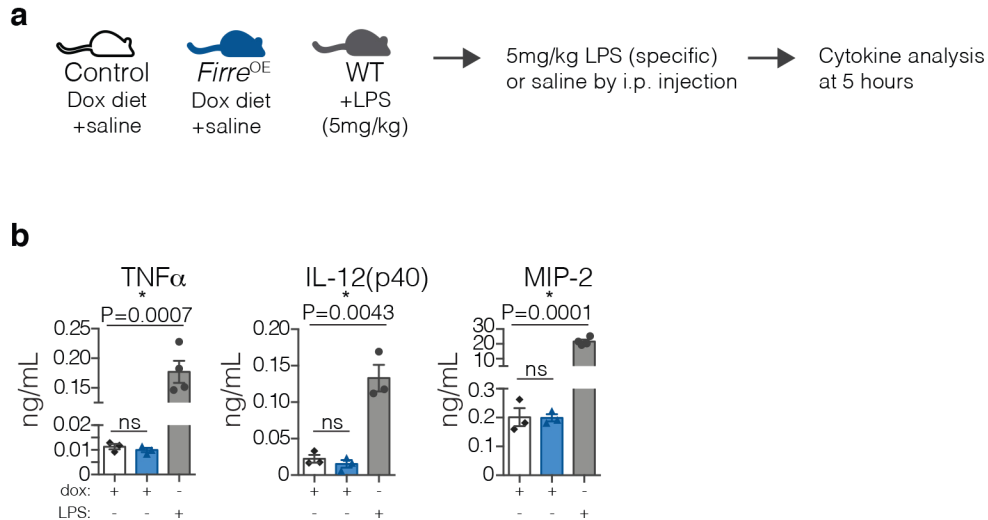

**Extended Data Figure 4. *Firre*<sup>OE</sup> mice unchallenged do not have increased levels in serum cytokines. (A)** Experimental schematic for cytokine measurements in 5-7 weeks old mice injected with either saline or LPS. **(B)** Cytokine measurements in serum at 5 hours post saline or LPS injection from control saline injected mice (WT or tg(*Firre*) fed a dox diet, n=3, black diamonds), *Firre*<sup>OE</sup> saline injected mice fed a dox diet (n=3, blue triangles), and WT mice fed a normal diet injected with 5 mg/kg LPS (specific-activity) (n=3 to 4, gray circles). Data are shown as mean  $\pm$  SEM and statistical significance determined using a two-tailed unpaired t-test.



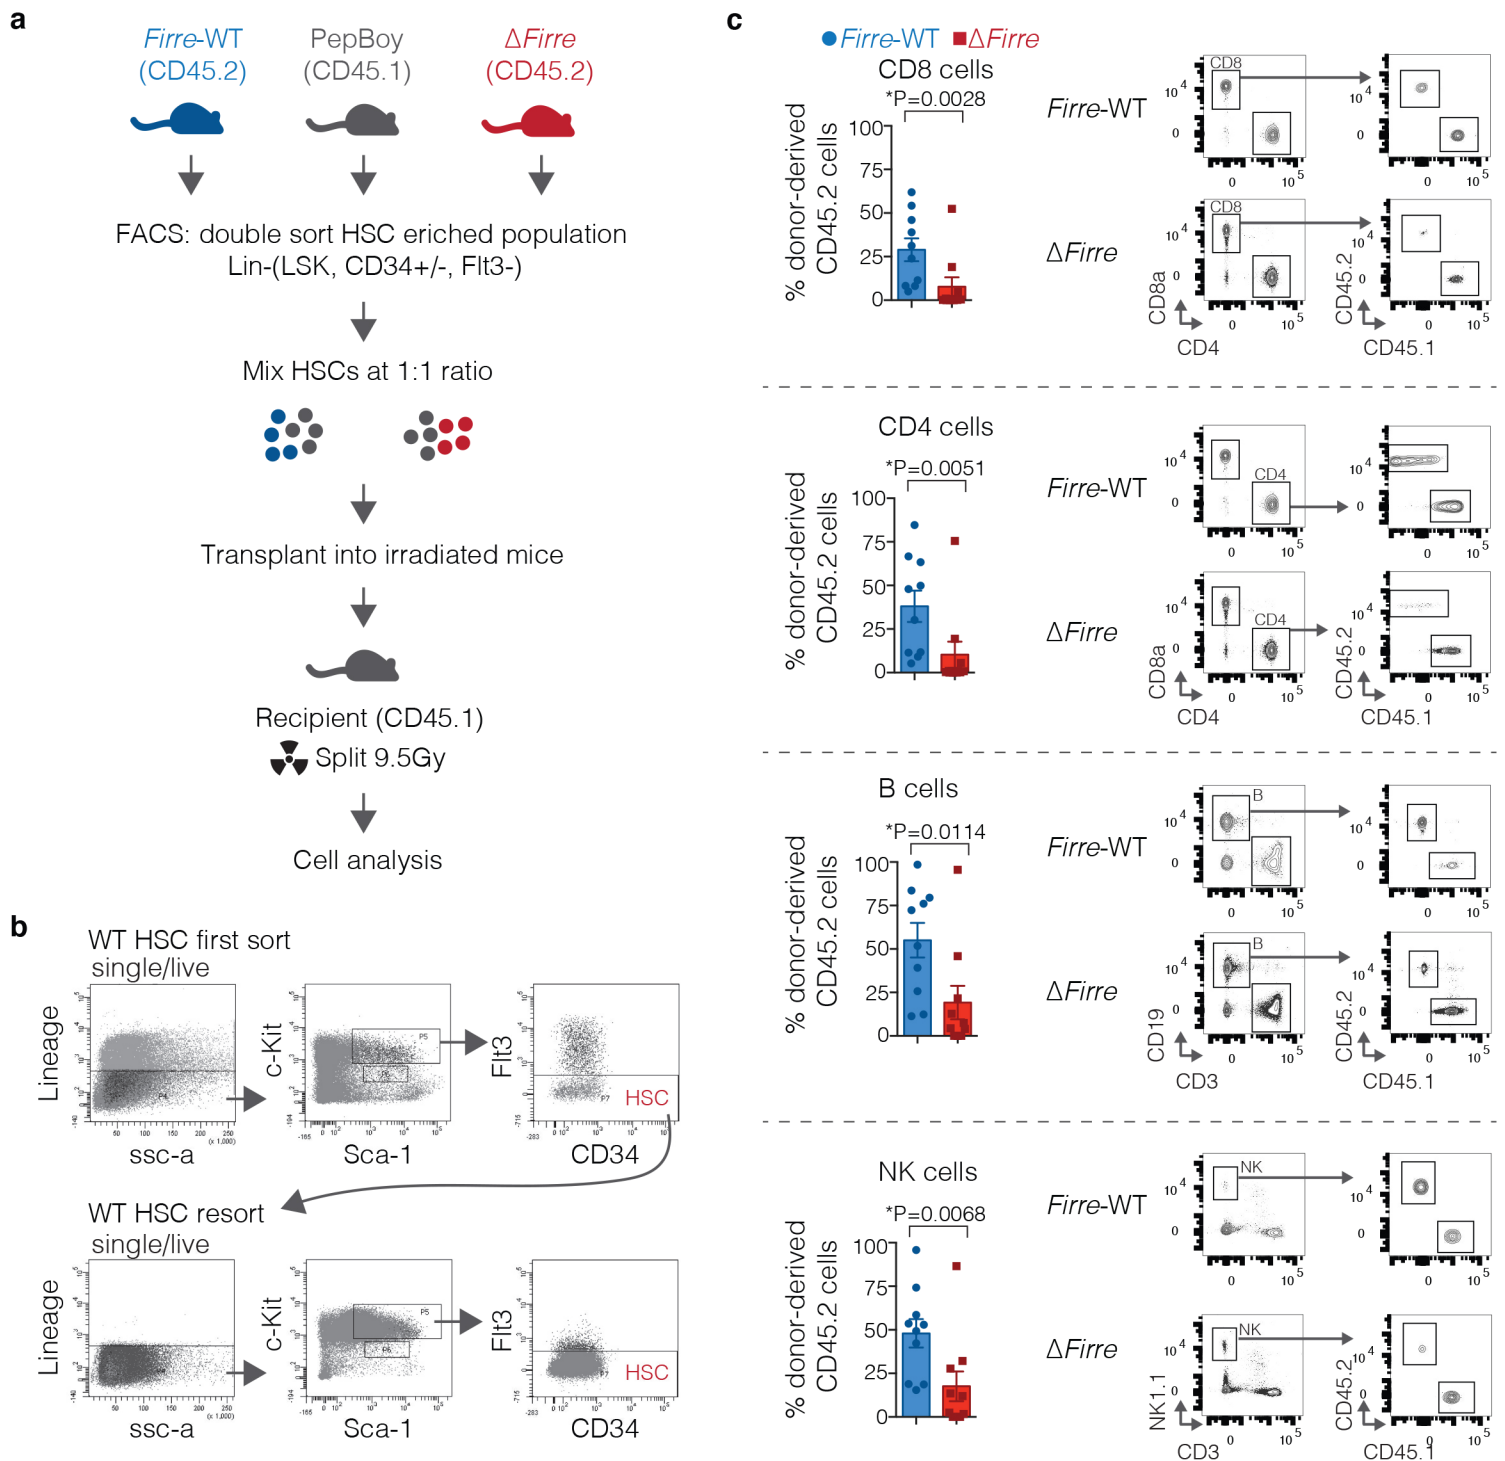

**Extended Data Figure 6.  $\Delta$ Firre HSC enriched population is less competitive than WT at repopulating the blood in vivo.**

**(A)** Schematic of competitive chimera HSC transplant experiment. HSC enriched population from age- and sex-matched Firre WT/CD45.2 (blue) or  $\Delta$ Firre/CD45.2 (red) combined with PepBoy/CD45.1 (gray) at a 1:1 ratio and transplanted into lethally irradiated (gray, gy) PepBoy/CD45.1 recipient male mice. **(B)** Representative flow cytometry plots from WT showing the FACS strategy used for isolating an HSC-enriched population for transplant. **(C)** Frequencies of donor-derived CD45.2 CD8, CD4, B, and NK cells in the peripheral blood at 23 weeks post competitive chimera transplant for Firre WT/CD45.2 with PepBoy/CD45.1 ( $n=10$ ) or  $\Delta$ Firre/CD45.2 with PepBoy/CD45.1 ( $n=10$ ) (two independent experiments shown). Data are shown as mean  $\pm$  SEM and significance determined by a two-tailed Mann-Whitney U test.

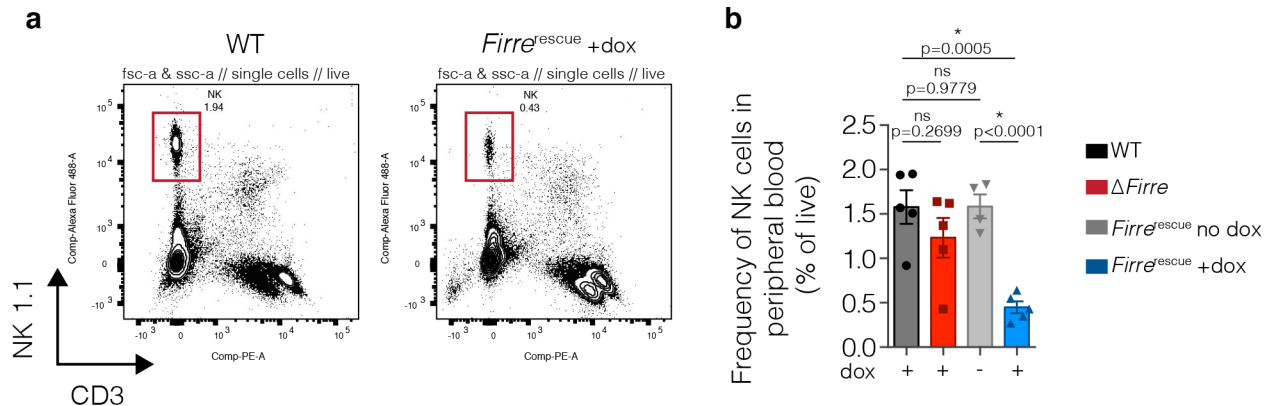

**Extended Data Figure 7. *Firre*<sup>rescue</sup> mice overexpressing *Firre* RNA have a decrease in the frequency of NK cells in the peripheral blood. (A)**

Representative flow cytometry plots of NK cells in WT and dox-treated *Firre*<sup>rescue</sup> mice. (B) Frequency of NK cells shown as percent live cells in the peripheral blood from female mice 24 to 33 weeks old: dox-treated WT (n=5), dox-treated  $\Delta$ *Firre* (n=5), no dox *Firre*<sup>rescue</sup> (n=4), and dox-treated *Firre*<sup>rescue</sup> (n=5). Data are shown as mean  $\pm$  SEM, two independent experiments, and significance determined by using a two-tailed unpaired t-test.



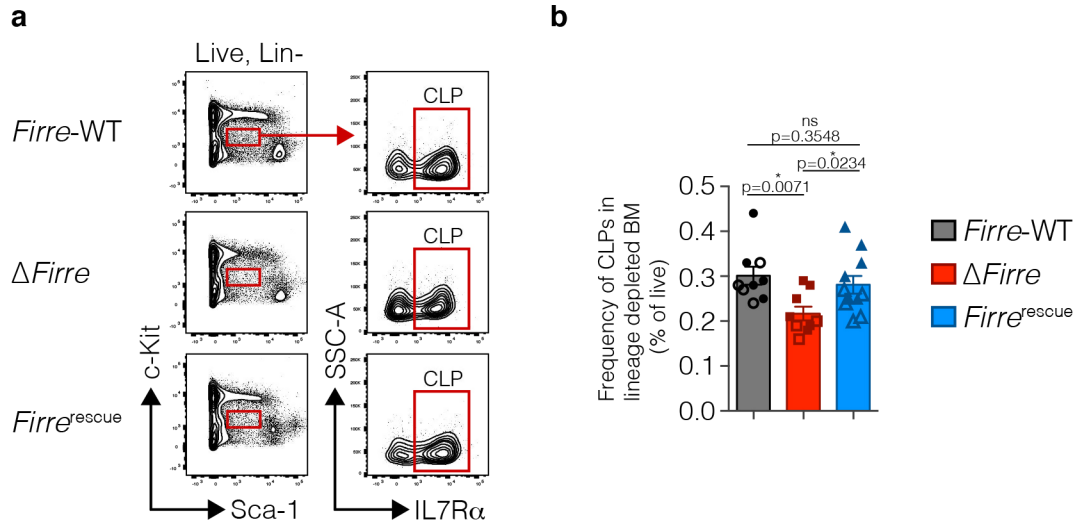

**Extended Data Figure 8. Overexpression of *Firre* RNA in *Firre*<sup>rescue</sup> mice restores CLP frequency in lineage-depleted bone marrow. (A)** Representative gating strategy for identifying CLPs in total and lineage depleted bone marrow (BM) from WT,  $\Delta$ *Firre*, and dox-treated *Firre*<sup>rescue</sup> mice. **(B)** Frequency of CLPs shown as percent of live cells in lineage depleted bone marrow over three experiments from male (7 to 10 weeks old, solid object) and female (19 to 24 weeks old, outlined object) mice: WT (n=9);  $\Delta$ *Firre* (n=9), and dox-treated *Firre*<sup>rescue</sup> (n=11). Data are plotted as the mean  $\pm$  SEM and significance determined by a two-tailed Mann-Whitney U test.

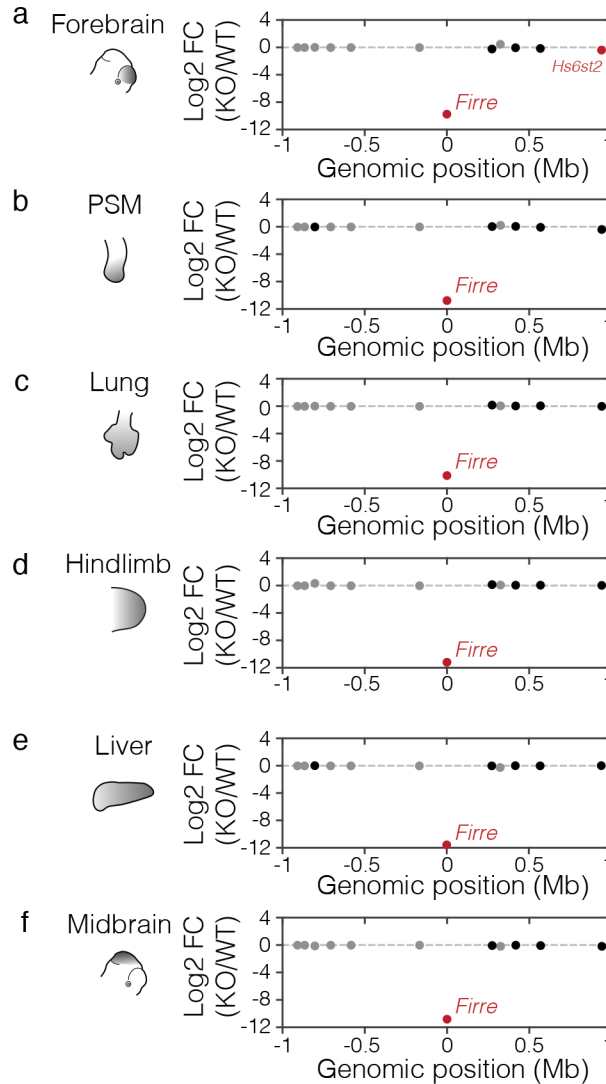

**Extended Data Figure 9. *Firre* does not regulate the expression of neighboring genes. (A-F)** *Firre* locus region (2 Mb) showing log<sub>2</sub> fold change (log<sub>2</sub> FC) gene expression differences (RNA-seq) between  $\Delta$ *Firre* and WT E11.5 tissues (forebrain, pre-somitic mesoderm (PSM), lung, hindlimb, liver, and midbrain). *Firre* is shown in red, significantly dysregulated genes are shown in red, genes with less than 1 FPKM expression are shown in gray, and genes that are not significantly changed are shown in black.

Table 1  
Lewandowski et al.,  
v14

| Mating Genotype                                               | Diet    | Litters | Total pups | Mean litter size ( $\pm$ sd) | Progeny Genotype                     | Number pups | ♂  | ♀  | n.d | P value |
|---------------------------------------------------------------|---------|---------|------------|------------------------------|--------------------------------------|-------------|----|----|-----|---------|
| ♂ <i>Firre</i> <sup>+ly</sup> x ♀ <i>Firre</i> <sup>+/+</sup> | Normal  | 6       | 39         | 6.5 $\pm$ 1.3                | Wildtype                             | 39          | 20 | 19 | 0   | 0.873   |
| ♂ <i>Firre</i> <sup>ly</sup> x ♀ <i>Firre</i> <sup>-/-</sup>  | Normal  | 10      | 68         | 6.8 $\pm$ 1.9                | $\Delta$ <i>Firre</i>                | 68          | 30 | 38 | 0   | 0.332   |
| -----                                                         |         |         |            |                              |                                      |             |    |    |     |         |
| ♂ rtTA x ♀ <i>Firre</i> <sup>OE</sup>                         | Control | 10      | 66         | 6.6 $\pm$ 1.5                | <i>Firre</i> <sup>Storm</sup> ; rtTA | 21          | 08 | 13 | 0   | 0.2752  |
|                                                               |         |         |            |                              | <i>Firre</i> <sup>Storm</sup>        | 23          | 11 | 07 | 05  |         |
|                                                               |         |         |            |                              | rtTA                                 | 11          | 03 | 01 | 07  |         |
|                                                               |         |         |            |                              | Wildtype                             | 09          | 02 | 04 | 03  |         |
|                                                               |         |         |            |                              | n.d                                  | 02          |    |    |     |         |
| ♂ rtTA x ♀ <i>Firre</i> <sup>OE</sup>                         | Dox.    | 33      | 206        | 5.7 $\pm$ 1.7                | <i>Firre</i> <sup>Storm</sup> ; rtTA | 41          | 19 | 22 | 0   | 0.6394  |
|                                                               |         |         |            |                              | <i>Firre</i> <sup>Storm</sup>        | 76          | 35 | 28 | 13  |         |
|                                                               |         |         |            |                              | rtTA                                 | 22          | 11 | 10 | 01  |         |
|                                                               |         |         |            |                              | Wildtype                             | 57          | 17 | 11 | 29  |         |
|                                                               |         |         |            |                              | n.d                                  | 10          |    |    |     |         |
| -----                                                         |         |         |            |                              |                                      |             |    |    |     |         |

**Extended Data Table 1. Genotype and male and female distribution in  $\Delta$ *Firre* and *Firre* overexpressing mice.**

Genotyping from progeny at P7 from intercrosses between male WT and female WT; male  $\Delta$ *Firre* and female  $\Delta$ *Firre*; male rtTA and female *Firre*<sup>OE</sup> no dox; and male rtTA and female *Firre*<sup>OE</sup> dox-diet mice. Litter size shown as mean with standard deviation (s.d.), not determined (n.d.), Chi-square statistic reported (p-value).
